1 **Slicing of viral RNA guided by endogenous piRNAs**  
2 **triggers the production of responder and trailer**  
3 **piRNAs in *Aedes* mosquitoes.**

4

5 **Joep Joosten<sup>1</sup>, Ronald P. Van Rij<sup>1+</sup> and Pascal Miesen<sup>1+</sup>**

6

7 <sup>1</sup>Department of Medical Microbiology, Radboud Institute for Molecular Life Sciences, Radboud University  
8 Medical Center, P.O. Box 9101, 6500 HB Nijmegen, The Netherlands

9 <sup>+</sup> corresponding authors: [ronald.vanrij@radboudumc.nl](mailto:ronald.vanrij@radboudumc.nl); [pascal.miesen@radboudumc.nl](mailto:pascal.miesen@radboudumc.nl)

10

11

12

13

14

15 **Key words:** piRNA, *Aedes* mosquitoes, endogenous viral element, Zucchini, Nibbler, phasing

16

## 17 **ABSTRACT**

18 PIWI interacting (pi)RNAs are small RNAs mostly known to protect the genomes of animal  
19 germlines against transposable elements. In *Drosophila*, piRNA-mediated cleavage of  
20 transposon RNA triggers the release of a responder piRNAs via the ping-pong amplification  
21 cycle. Responder piRNA 3' end formation by the endonuclease Zucchini is coupled to the  
22 production of downstream trailer piRNAs, expanding the repertoire of piRNAs that target  
23 transposons. Intriguingly, in *Aedes aegypti* mosquitoes, somatic piRNAs are produced from  
24 viral RNA, implying a role of viral (v)piRNAs in antiviral immunity. Knowledge on how vpiRNA  
25 3' ends are formed and whether viral RNA is subjected to trailer piRNA production, however,  
26 is lacking. To address these questions, we analyzed small RNA sequencing libraries from  
27 *Ae. aegypti* cells. We found that virus- and transposon-derived piRNAs have sharply defined  
28 3' ends, and that uridine residues are enriched directly downstream of dominant piRNA  
29 sequences, both of which are characteristic features of Zucchini-like cleavage of precursor  
30 piRNAs. Next, we designed a piRNA reporter system based on Sindbis virus recombinants  
31 that harbor target sites for abundant endogenous piRNAs. These piRNAs guide cleavage of  
32 the viral RNA, which is subsequently processed into abundant responder piRNAs. Using this  
33 reporter virus system, we identified the *Ae. aegypti* orthologs of Zucchini, which is required  
34 for sharp 3' end formation of responder piRNAs, and Nibbler, a 3'-5' exonuclease involved in  
35 the trimming of a subset of piRNAs and miRNAs. Furthermore, we found that cleavage of  
36 viral RNA triggers the production of trailer piRNAs, thus expanding the piRNA sequence pool  
37 that is able to target viral RNA. Our results have important implications for understanding how  
38 autonomous piRNA production from viral RNA can be triggered by just a few cleavage events  
39 by genome-encoded piRNAs.

40

## 41 INTRODUCTION

42 Blood-feeding mosquitoes of the *Aedes* genus are responsible for the spread of arthropod-  
43 borne (arbo)viruses that cause severe diseases, such as dengue, Zika, chikungunya and  
44 yellow fever. Due to rising global temperatures and increased human mobility, the  
45 geographical distribution of these vector mosquitoes is continuously expanding, which has  
46 resulted in a rapid increase in the number of arbovirus epidemics in the last decennia (1). For  
47 efficient transmission to occur, arboviruses have to actively replicate in several mosquito  
48 tissues to eventually infect the salivary gland (2). Therefore, suppression of virus replication  
49 by the mosquito antiviral immune response strongly affects the efficiency of arboviral spread.  
50 The cornerstone of antiviral immunity in insects is the small interfering (si)RNA pathway, in  
51 which viral double stranded (ds)RNA is cleaved by Dicer-2 (3). The resulting cleavage  
52 products are processed into siRNAs, which provide sequence specificity to the endonuclease  
53 Argonaute 2 to direct the cleavage of single stranded viral transcripts.

54 Intriguingly, in *Aedes* mosquitoes, viral RNA is also processed by a somatically active PIWI  
55 interacting (pi)RNA pathway, suggesting that two independent small RNA pathways act in  
56 parallel to combat viral infections (4). The piRNA biogenesis machinery has been thoroughly  
57 characterized in the model organism *Drosophila melanogaster*, where a germline-restricted  
58 piRNA pathway defends the genome from parasitic genetic elements called transposons  
59 (5,6). piRNA biogenesis is initiated by the cleavage of genomically encoded piRNA  
60 precursors, which are rich in transposon remnants. Slicing of these precursor transcripts into  
61 pre-piRNAs is mediated either by a piRNA-guided PIWI protein or the endonuclease Zucchini  
62 (Zuc), which acts independently of small RNAs (7-9). Pre-piRNAs are loaded into the PIWI  
63 proteins Aubergine (Aub) and Piwi, where their 3' ends may be further trimmed by the  
64 exonuclease Nibbler (Nbr) and are finally 2'-O-methylated by Hen1 to generate mature  
65 piRNAs (10-14). Whereas Piwi translocates to the nucleus to silence transposons at the  
66 transcriptional level (15,16), Aub remains in the cytoplasm where it cleaves transposon  
67 mRNA with sequence complementarity to its associated piRNA (17,18). The resulting  
68 cleavage fragments are loaded into the PIWI protein Argonaute 3 (Ago3) and processed into  
69 responder piRNAs by Nbr-mediated trimming, followed by 2'-O-methylation by Hen1 (12,14).  
70 In turn, these responder piRNAs direct Ago3-mediated cleavage of piRNA precursors,  
71 triggering the production of new initiator piRNAs, completing the so-called ping-pong loop  
72 (17-20).

73 In *Drosophila*, Zuc-mediated generation of piRNA 3' ends often produces a downstream  
74 cleavage product which is preferentially loaded into Piwi, thus forming a new pre-piRNA. This  
75 mechanism results in phased processing of piRNA precursor transcripts into a string of  
76 piRNAs, named trailer piRNAs (8,9). Hence, while the ping-pong loop amplifies those piRNAs  
77 that initially recognized active transposons, phased piRNA production expands the piRNA  
78 repertoire to allow for more efficient repression of transposons. Historically, piRNAs derived  
79 from cluster transcripts and transposon mRNAs were termed primary and secondary piRNAs,  
80 respectively. Hereafter, we use the more intuitive names initiator or responder for ping-pong  
81 amplified piRNAs and trailer for piRNAs produced through phased biogenesis, as proposed  
82 in (5).

83 The *Ae. aegypti* piRNA pathway differs from that in *Drosophila* in three important ways: *i*) the  
84 pathway is active in somatic tissues as well as germline tissues (21,22), *ii*) it processes non-  
85 canonical substrates such as *de novo* produced viral RNA (23-25), and *iii*) mosquito piRNA  
86 clusters contain large numbers of endogenous viral elements (EVEs): sequences of non-  
87 retroviral RNA viruses inserted in mosquito genomes (26-28). These EVEs give rise to  
88 abundant piRNAs (26,29,30) and mediate antiviral defense (31-33).

89 In *Ae. aegypti* mosquitoes, the PIWI proteins Piwi5 and Ago3 are brought together by the  
90 TUDOR proteins Veneno and Yb and the RNA helicase Vasa to promote efficient ping-pong  
91 dependent production of piRNAs (34), yet, the mechanisms involved in specifying piRNA 3'  
92 ends is unknown. Moreover, while the *Ae. aegypti* piRNA pathway was recently proposed to  
93 efficiently generate trailer piRNAs (7), the molecular machinery responsible for phased piRNA  
94 production and whether viral RNA is also subjected to phased piRNA production is unclear.  
95 It has been proposed that endogenous piRNAs encoded in the mosquito genome can trigger  
96 the production of piRNAs from viral sources (31,32). We hypothesized that through the  
97 mechanism of piRNA phasing, a single endogenous initiator piRNA could induce the  
98 production of a pool of viral piRNAs, thereby increasing the piRNA population that targets  
99 viral RNA. Here, we uncover that this interaction between an endogenous initiator piRNAs  
100 and viral RNA substrate indeed takes place in *Ae. aegypti*. Specifically, we demonstrate that  
101 *Ae. aegypti* piRNAs, both of transposon and viral origin, display sequence features indicative  
102 of a Zucchini-like biogenesis mechanism. Hence, we use a viral piRNA reporter system to  
103 show that AAEL011385 and AAEL005527, the *Ae. aegypti* orthologs of *Drosophila* Zuc and  
104 Nibbler, respectively, cooperatively determine piRNA 3' ends. Lastly, we show that cleavage

105 guided by a genomically encoded initiator piRNA triggers the production of additional trailer  
106 piRNAs from the viral genome, thus increasing the pool of piRNAs targeting the newly  
107 infecting virus. This mechanism may equip the *Aedes* piRNA pathway with an adaptive  
108 immune response that is able to adapt to newly encountered and continuously mutating  
109 viruses.

110

## 111 **RESULTS AND DISCUSSION**

### 112 ***Aedes aegypti* piRNAs have sharp 3' ends**

113 In *Drosophila*, piRNA 3' end formation is largely dependent on the cleavage of pre-piRNAs  
114 by the endonuclease Zucchini (Zuc). Zuc uses a sequence motif to preferentially cleave  
115 upstream of uridine residues *in vivo* (35-37), hence, piRNAs generated by Zuc generally have  
116 sharp 3' ends and the nucleotide directly downstream of the 3' end tends to be a uridine (+1U  
117 bias) (8,9). We examined whether these characteristics were present in our previously  
118 generated small RNA deep sequencing libraries from *Ae. aegypti* Aag2 cells (24) infected  
119 with Sindbis virus (SINV), a positive sense RNA virus of the *Togaviridae* family. We first  
120 analyzed transposon-derived piRNAs and found that individual piRNAs, defined by a shared  
121 5' end, generally had the same length (Figure 1A). Specifically, for almost 60% of piRNAs the  
122 dominant length made up more than 75% of sequenced reads. We selected those piRNAs  
123 for which the dominant sequence length represented at least 75% of the reads and inspected  
124 the identity of the nucleotides downstream of that most abundant piRNA isoform. We found  
125 that the nucleotide position directly following the 3' end of the piRNA was biased for uridine  
126 (Figure 1B), strongly indicating that these piRNAs were generated by a mechanism that  
127 resembles Zuc cleavage in *Drosophila*. Strikingly, sharp 3' ends and +1U biases were also  
128 clearly visible for SINV-derived piRNAs, irrespective of the strand from which the piRNAs  
129 were produced (Figure 1C-D). These findings suggest that 3' ends of both (+) strand derived  
130 vpiRNAs, which are predominantly Ago3-associated and (-) strand derived vpiRNAs, which  
131 are mostly Piwi5-bound (24,34), are generated, at least in part, by Zuc-like cleavage events.  
132 Interestingly, we also observe sharp 3' ends and +1U biases for piRNAs generated from  
133 Phasi Charoen-like virus (Figure S1), a negative sense RNA virus from the *Phenuiviridae*  
134 family that persistently infects Aag2 cells (38). These findings indicate that Zuc-like piRNA  
135 biogenesis targets diverse RNA viruses.

136

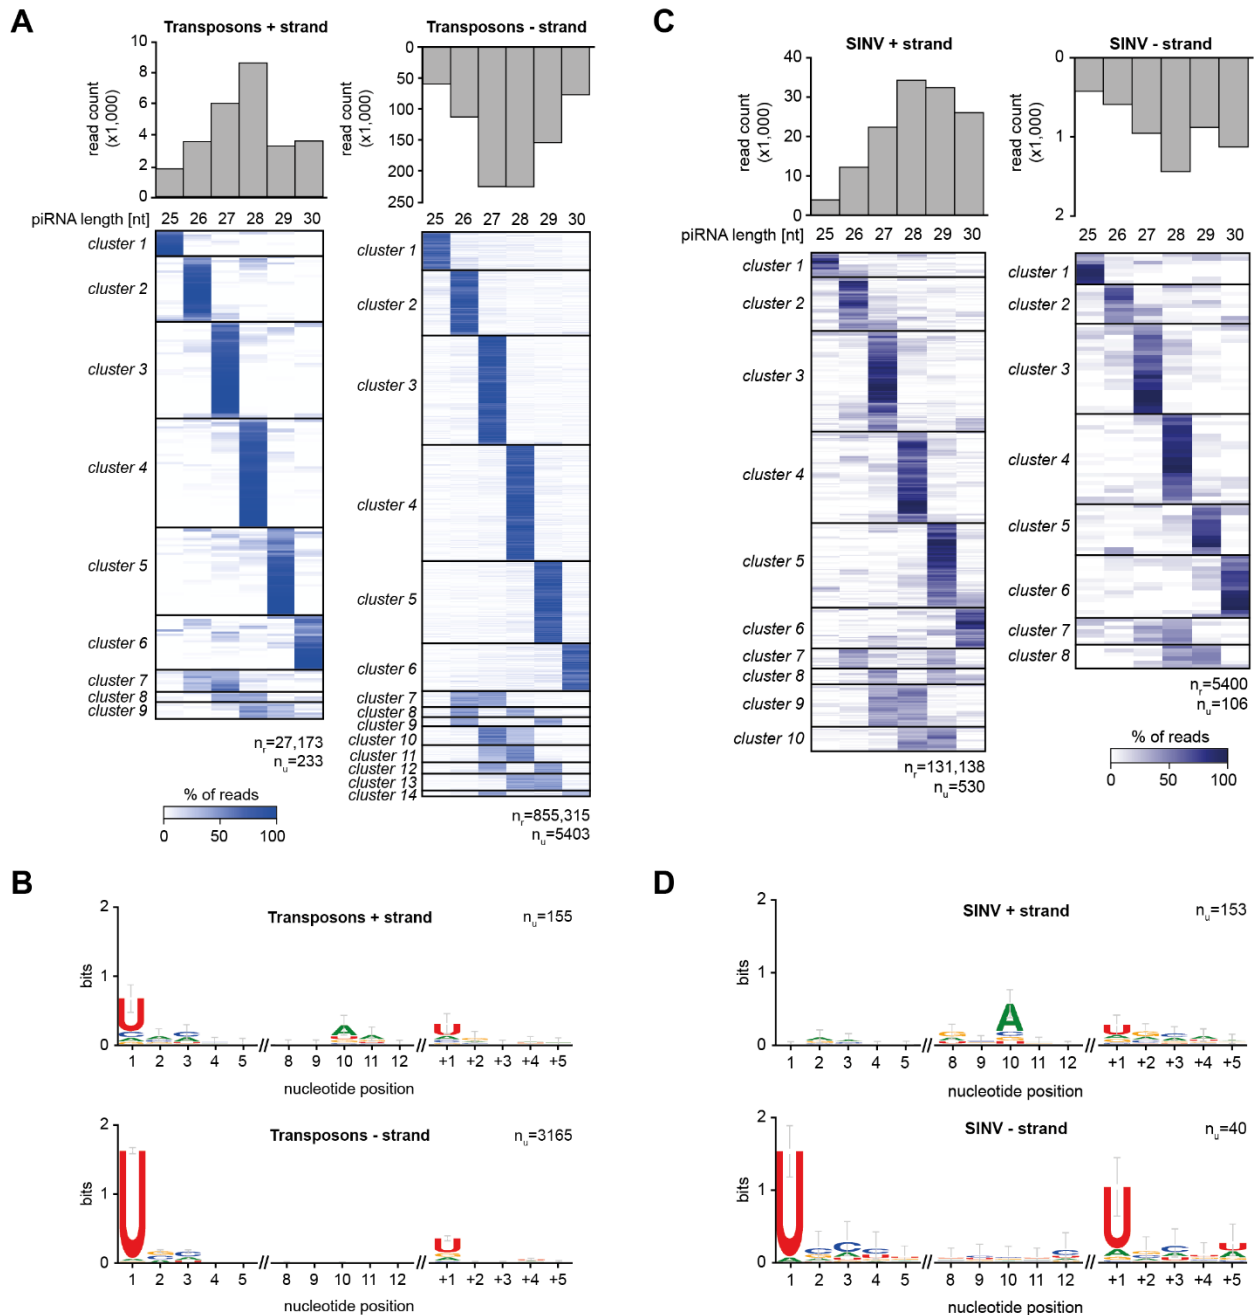

**Figure 1. *Aedes aegypti* piRNAs have sharp 3' ends**

**(A)** Heat map showing the relative size distribution of individual transposon-derived piRNAs, defined by a shared 5' end. Shades of blue indicate the percentage of reads contributing to the indicated read length, white represents absence of reads in the specific size class. The number of unique piRNAs ( $n_u$ ) and the number of reads ( $n_r$ ) that underlie the heat map are indicated. A minimum of 20 reads/unique piRNA was required to be included in the analysis.

**(B)** Nucleotide biases for the indicated nucleotide positions of transposon-derived piRNAs and the sequence at the genomic region directly downstream (+1 until +5) piRNA 3' ends. Only piRNAs from (A) that had a dominant length (at least 75% of reads) were considered in this analysis and only unique sequences were analyzed, disregarding read count for the individual piRNAs.

**(C-D)** The same analysis as for A and B was applied to piRNAs mapping to SINV.

137

138 **Genomically encoded piRNAs are able to trigger production of virus-derived**  
139 **responder piRNAs**

140 To study sequence determinants for vpiRNA 3' end formation, we designed a SINV-based

141 reporter system in which exogenous piRNA target sequences can be easily introduced. We  
142 modified SINV such that a duplicated subgenomic promoter drives the expression of a non-  
143 coding RNA sequence that harbors a target site for an abundant Piwi5-associated initiator  
144 piRNA (Figure 2A, Figure S2A). Initiator piRNA-guided recognition of the target site should  
145 trigger slicing by Piwi5 and subsequent processing of the resulting cleavage fragment into an  
146 Ago3-associated responder piRNA through the ping-pong amplification cycle. We designed  
147 viruses with target sites for two abundant endogenous Piwi5-associated initiator piRNAs: one  
148 derived from the *Ty3/gypsy* LTR retroelement *gypsy73* (*g73* - Figure 2A), and a second  
149 originating from an EVE of flaviviral origin (FV53, described in Supplemental text).

150 Our previous results indicate that both transposon- and SINV-derived piRNAs have a strong  
151 bias towards a uridine residue directly downstream their 3' ends (Figure 1B, D). To study the  
152 importance of +1U for viral responder piRNA production in *Aedes* mosquitoes, we introduced  
153 uridine residues at specified distances from the putative Piwi5 slice site in the viral reporter  
154 system (Figure 2A; viruses were named *g73-25U*, *28U*, and *30U* according to the responder  
155 piRNA 5' end-to-U distance). Responder piRNAs were readily detected by high resolution  
156 northern blotting in Aag2 cells infected with all reporter viruses (Figure 2B), but not in cells  
157 infected with control virus expressing GFP from the duplicated subgenomic promoter (SINV  
158 3'GFP). These results indicate that endogenous piRNAs may instruct the cleavage of  
159 exogenous viral RNA and the subsequent production of responder piRNAs during acute  
160 infection.

161 Responder piRNA size did not fully reflect the distance between the Piwi5 cleavage site and  
162 the downstream uridine residue; while no clear differences in responder piRNA size are  
163 observed between *g73-25U* and *g73-28U* viruses, increasing the 5' end-to-U distance to 30  
164 nt (*g73-30U*) results in a more diffuse distribution of responder piRNA 3' ends (Figure 2B).  
165 These data suggest that downstream uridines may not be absolutely required for determining  
166 the 3' ends of the reporter-derived responder piRNAs or that additional exonucleolytic  
167 trimming of pre-piRNA 3' ends mask a putative endonucleolytic cleavage event directly  
168 upstream of the uridine residues.

169 To discriminate between these two possibilities, we generated small RNA deep sequencing  
170 libraries from Aag2 cells infected with the various reporter viruses. We hypothesized that  
171 even if a Zuc mediated cleavage event would be masked by exonucleolytic trimming, the  
172 presence of downstream trailer piRNAs with 5' ends coinciding with the U residues would



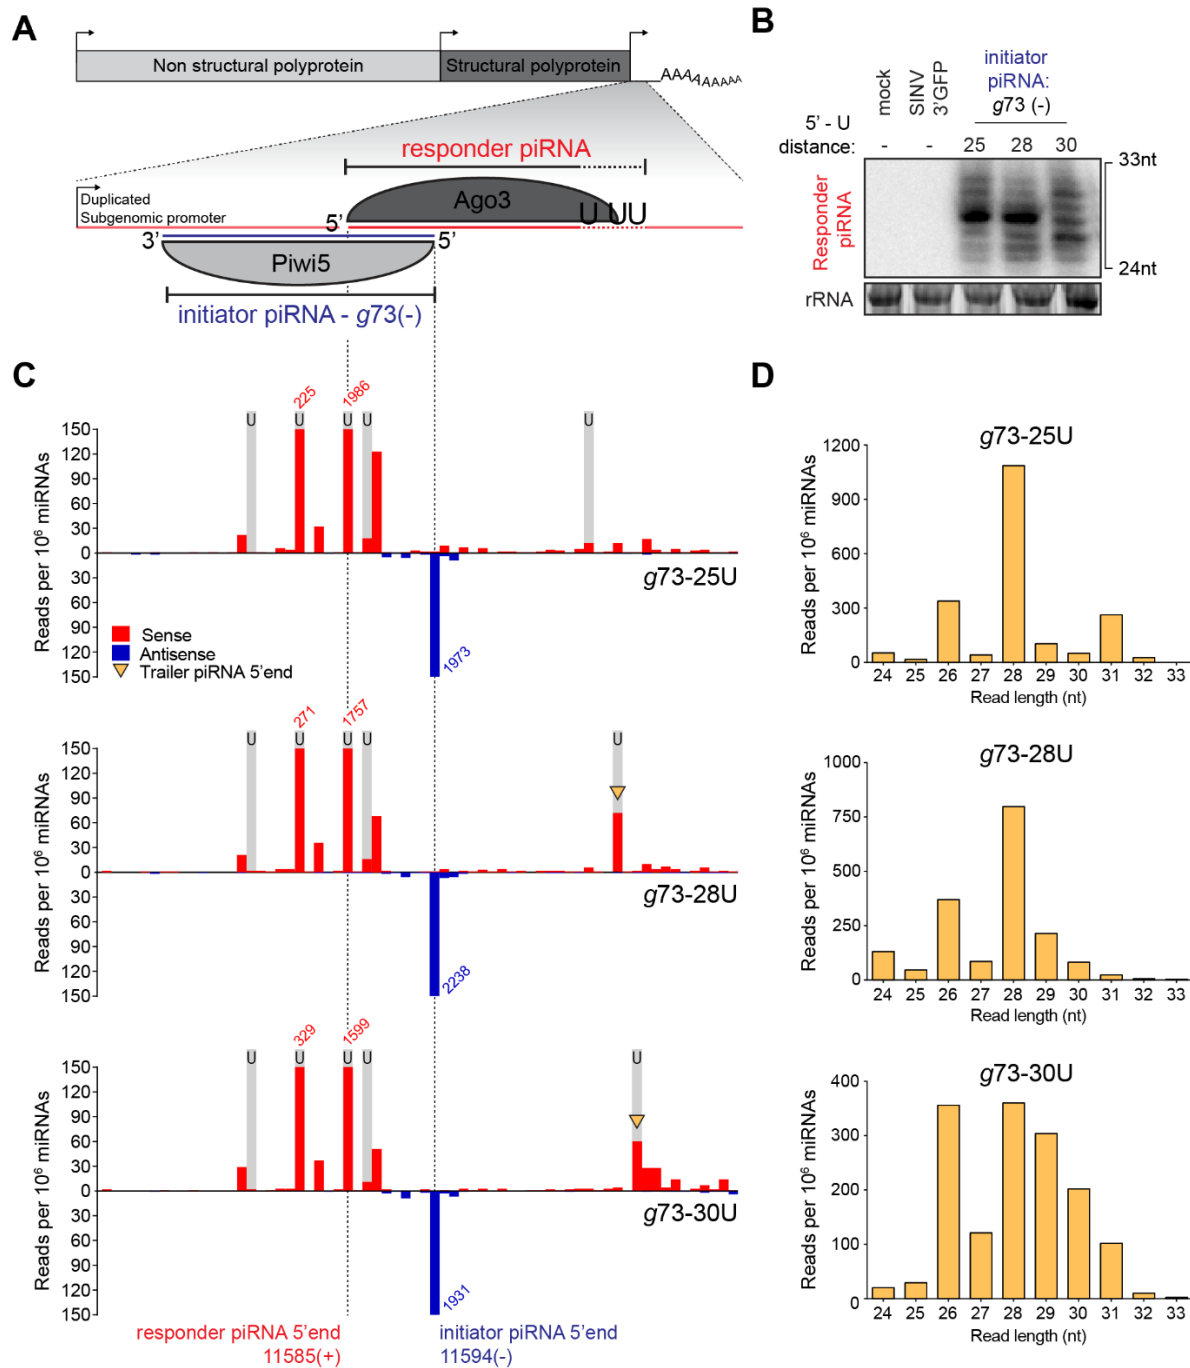

**Figure 2. An endogenous piRNA is able to trigger production of virus-derived responder piRNAs**

(A) Schematic representation of recombinant Sindbis reporter viruses. The enlarged view depicts the reporter locus expressed under the control of a duplicated subgenomic promoter. This non-coding RNA harbors a target site for a Piwi5-associated initiator piRNA derived from the *Ty3-gypsy73* retrotransposon (*g73* - indicated in blue). Slicing of this target triggers the production of responder piRNAs (indicated in red) that are loaded into Ago3. The distance between the responder piRNA 5' end and the position of downstream uridine residues in the various viruses used in later experiments are shown.

(B) Northern blot analyses of responder piRNA production in cells infected with the indicated reporter viruses. Numbers indicate the distance between the 5' end of the responder piRNA and the first downstream uridine residue. SINV 3' GFP is a virus without an initiator piRNA target site and serves as a negative control, as do mock-infected cells. The positions marking 24 and 33 nt are inferred from an EtBr-stained small RNA size marker. EtBr-stained rRNA serves as loading control.

(C) Visualization of 5' ends of sense (red) and antisense (blue) piRNAs (24-33 nt) mapping to the reporter locus of the indicated viruses. Dashed lines indicate responder and initiator piRNA 5' ends and the positions of grey shading indicate the location of uridine residues on the sense strand of the various viruses. The red and blue numbers show piRNA counts (in reads per  $10^6$  miRNAs) that exceed the range of the y-axis; yellow arrowheads indicate the 5' ends of trailer piRNAs.

(D) Size distribution of responder piRNAs produced from the various *g73*-viruses, as determined by small RNA deep sequencing. Read counts were normalized to the number of miRNAs in each library.



173 indicate Zuc-mediated endonucleolytic cleavage was responsible for generating the  
174 responder piRNA 3' end. Mapping of piRNA 5' ends to the genomes of *g73*-targeted viruses  
175 reveals that virtually no antisense piRNAs other than the initiator piRNAs map to the reporter  
176 sequence (Figure 2C). These initiator piRNAs trigger the production of highly abundant sense  
177 responder piRNAs with characteristic 10 nt overlap of piRNA 5' ends, indicative of production  
178 by ping-pong amplification (Figure 2C). Responder piRNA size distribution for *g73*-targeted  
179 viruses generally recapitulates the results from the northern blot analysis, with reduced 3'  
180 end sharpness for the *g73*-30U virus (Figure 2D).

181 We noted that responder piRNAs <26 nt in size are inefficiently produced from any virus  
182 (including those with a responder 5' end-to-U distance of 25 nt: *g73*-25U and FV53-25/28U).  
183 As responder piRNAs are expected to associate with Ago3, we hypothesize that Ago3 may  
184 cover the first 25 nucleotides of pre-piRNAs, rendering them inaccessible to endo- or  
185 exonucleolytic processing. Indeed, small RNA data from Ago3 immunoprecipitation indicate  
186 a clear preference of Ago3 to bind piRNAs in the size range of 26-30 nt (Figure S3A). In line  
187 with this, responder piRNAs produced from all reporter viruses are predominantly 26-30 nt in  
188 size (Figure 2D).

189 Intriguingly, in viruses with a responder piRNA 5' end-U distance  $\geq 28$  nt, we uncover the  
190 production of a putative trailer piRNA (indicated with yellow arrowheads in Figure 2C)  
191 downstream of the responder piRNA. Even in viruses that produce responder piRNAs with  
192 diffuse 3' ends (e.g. *g73*-30U), the 5' end of the following trailer piRNA is sharply defined at  
193 the downstream uridine. These data suggest that downstream uridines may instruct  
194 endonucleolytic cleavage, thus coupling responder (pre-)piRNA 3' end formation to trailer  
195 piRNA 5' end formation. Accordingly, no trailer piRNA production is observed in cells infected  
196 with the *g73*-25U virus, in which we propose the downstream uridine is inaccessible for  
197 endonucleolytic cleavage. The diffuse responder piRNA size profile of *g73*-30U likely results  
198 from trimming of piRNA 3' ends.

## 199 200 **Responder piRNAs are produced through ping-pong mediated slicing**

201 We previously identified Ago3 and Piwi5 as the core components of the ping-pong  
202 amplification loop in *Ae. aegypti* (24,34). We thus wanted to analyze which PIWI proteins are  
203 responsible for the generation of the responder piRNAs from our reporter virus. As expected,

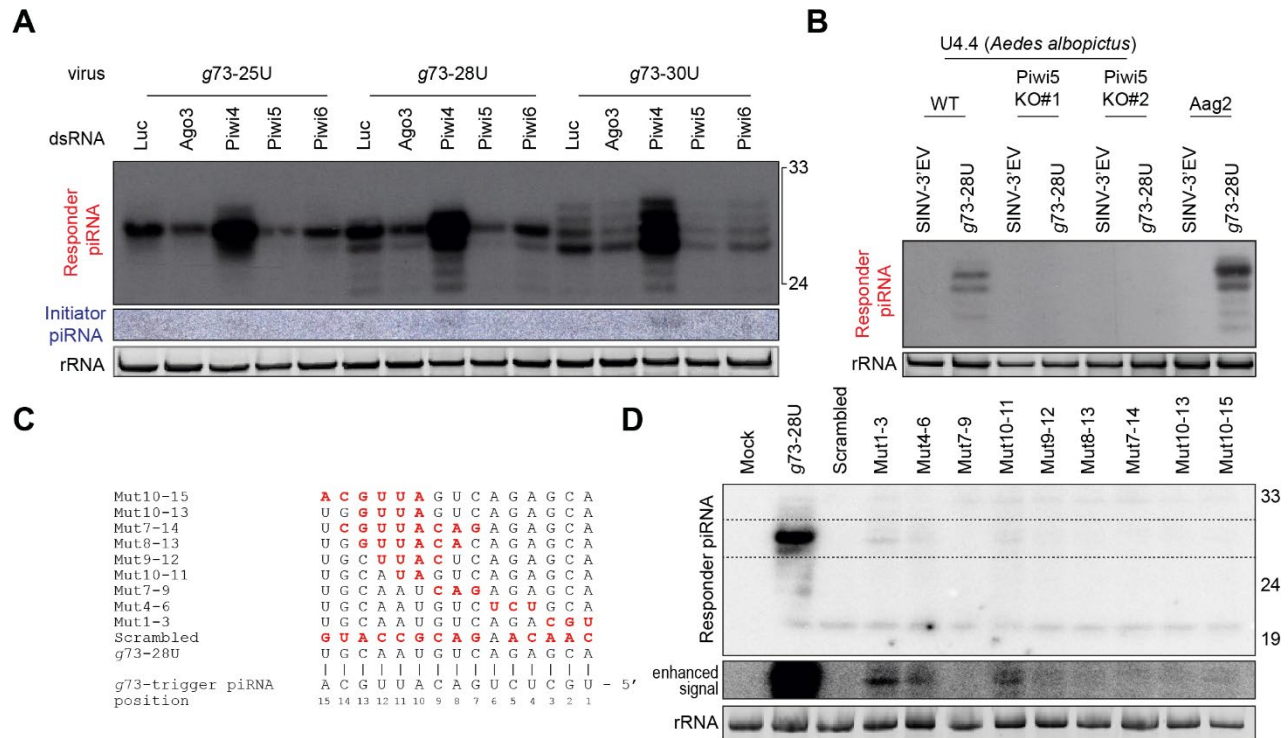

**Figure 3. Responder vpiRNAs are produced through ping-pong mediated slicing**

**(A)** Northern blot analysis of viral responder and *g73*-initiator piRNA levels in Aag2 cells in which indicated PIWI proteins are depleted by dsRNA transfection. EtBr stained-rRNA serves as loading control.

**(B)** Northern blot analysis of responder piRNA production in wildtype (WT) and Piwi5 knockout (KO) *Ae. albopictus* U4.4 cells and *Ae. aegypti* Aag2 cells infected with the *g73*-28U virus or a virus that does not express the reporter locus from the second subgenomic promoter (SINV-3' EV). EtBr-stained rRNA serves as a loading control.

**(C)** Magnification of the first 15 nucleotides of the *g73* piRNA-target site, showing the mutations in the target site sequence of the various viruses. Red bold font indicates mutated residues that are mismatched with the *g73* initiator piRNA and the numbers denote positions relative to the *g73* initiator piRNA 5' end.

**(D)** Northern blot analysis of responder piRNA production in Aag2 cells infected with indicated (mutant) viruses. Responder piRNAs were detected using the 'minimal responder' probe that hybridizes to the last 18 nt at the 3' end of the responder piRNA (indicated in yellow in (C)), which are identical for all viruses. The dashed box denotes an area for which the contrast was adjusted to enhance weak responder piRNA signals (enhanced signal – middle panel). EtBr stained rRNA serves as loading control (bottom panel).

204

205 responder piRNA production was reduced upon knockdown of genes encoding the ping-pong  
 206 partners Ago3 and Piwi5 and, to a lesser extent Piwi6 (Figure 3A, S4A). Surprisingly,  
 207 responder piRNA production was increased upon Piwi4 knockdown, which may be explained  
 208 by increased levels of the *g73*-derived initiator piRNA in Piwi4 knockdown (Figure 3A). The  
 209 Piwi5-dependency of *g73* responder piRNA production was further validated in Piwi5  
 210 knockout *Aedes albopictus* U4.4 cells (Figure 3B, S4B).

211 We next investigated targeting requirements for responder piRNA production. To this end,  
 212 we introduced target site mutations into the seed region (nt 2-8) and around the putative slice  
 213 site (nt 10-11, Figure 3C, S4C). Responder piRNA production was strongly depleted in  
 214 viruses in which mutations were introduced in the seed sequence (Mut 1-3, Mut 4-6 and Mut  
 215 7-9), compared to a virus bearing the intact target site (*g73*-28U, Figure 3D). Similarly,

216 introducing mismatches around the slice site resulted in strongly reduced responder piRNA  
217 production. As viral RNA levels are virtually unchanged between all viruses, reduced  
218 responder piRNA production cannot result from differences in the amount of available  
219 substrate (Figure S4D). Weak responder piRNA production was observed in two seed  
220 mutants (Mut 1-3 and Mut 4-6) as well as one slice site mutant (Mut10-11) (Figure 3D). These  
221 data suggests that low level piRNA slicing may occur even in the absence of full  
222 complementarity in the seed region or the slice site, in line with findings in *Drosophila* (9) and  
223 mouse (39).

224

### 225 **Zuc-mediated endonucleolytic cleavage defines piRNA 3'ends**

226 Our previous results suggest the involvement of a Zucchini (Zuc)-like endonuclease in the  
227 generation of responder piRNAs 3' ends and trailer piRNA 5' ends. Hence, we used our viral  
228 responder piRNA reporter to identify the mosquito ortholog of Zuc. As the catalytic activity of  
229 Zuc lies in its phospholipase D (PLDc\_2)-domain, we first identified all *Ae. aegypti* PLDc\_2-  
230 domain containing proteins. The neighbor joining tree shows that AAEL011385 has the  
231 highest degree of similarity to the various Zucchini orthologs (Figure 4A). The protein  
232 encoded by this gene contains a fully conserved catalytic H(X)K(X4)D (HKD)-motif (Figure  
233 S5A), suggesting that its endonucleolytic activity is conserved. Moreover, akin to Zuc  
234 orthologs in various other species (5,6), AAEL011385 localizes to the mitochondria in Aag2  
235 cells (Figure 4B).

236 To our surprise, we found that AAEL011385 contains a sizeable insertion directly  
237 downstream of the catalytic HKD-motif (Figure S5A). Similarly, *Drosophila* Zuc also contains  
238 a (much smaller) insertion in the same location relative to mouse mitoPLD, suggesting it is a  
239 variable region beyond *Aedine* mosquitoes. This non-conserved region is part of a helix that  
240 sticks out of the Zuc core structure (36). Homology detection revealed that the large insertion  
241 is conserved in the *Culicidae* family, but not in *Drosophila*, suggesting it is a mosquito-specific  
242 insertion. Moreover, during cloning of the AAEL011385 gene, we found that the size of this  
243 insertion is increased in Aag2 cells (32 additional amino acids; Figure S5A).

244 We next aimed to functionally validate AAEL011385 as the ortholog of *DmZuc*. Indeed,  
245 knockdown of AAEL011385 in Aag2 cells resulted in a broader size distribution of viral  
246 responder piRNAs (Figure 4C, Figure S5B), which is consistent with reduced sharp  
247 endonucleolytic 3' end generation. Knockdown of the other PLDc\_2 domain containing

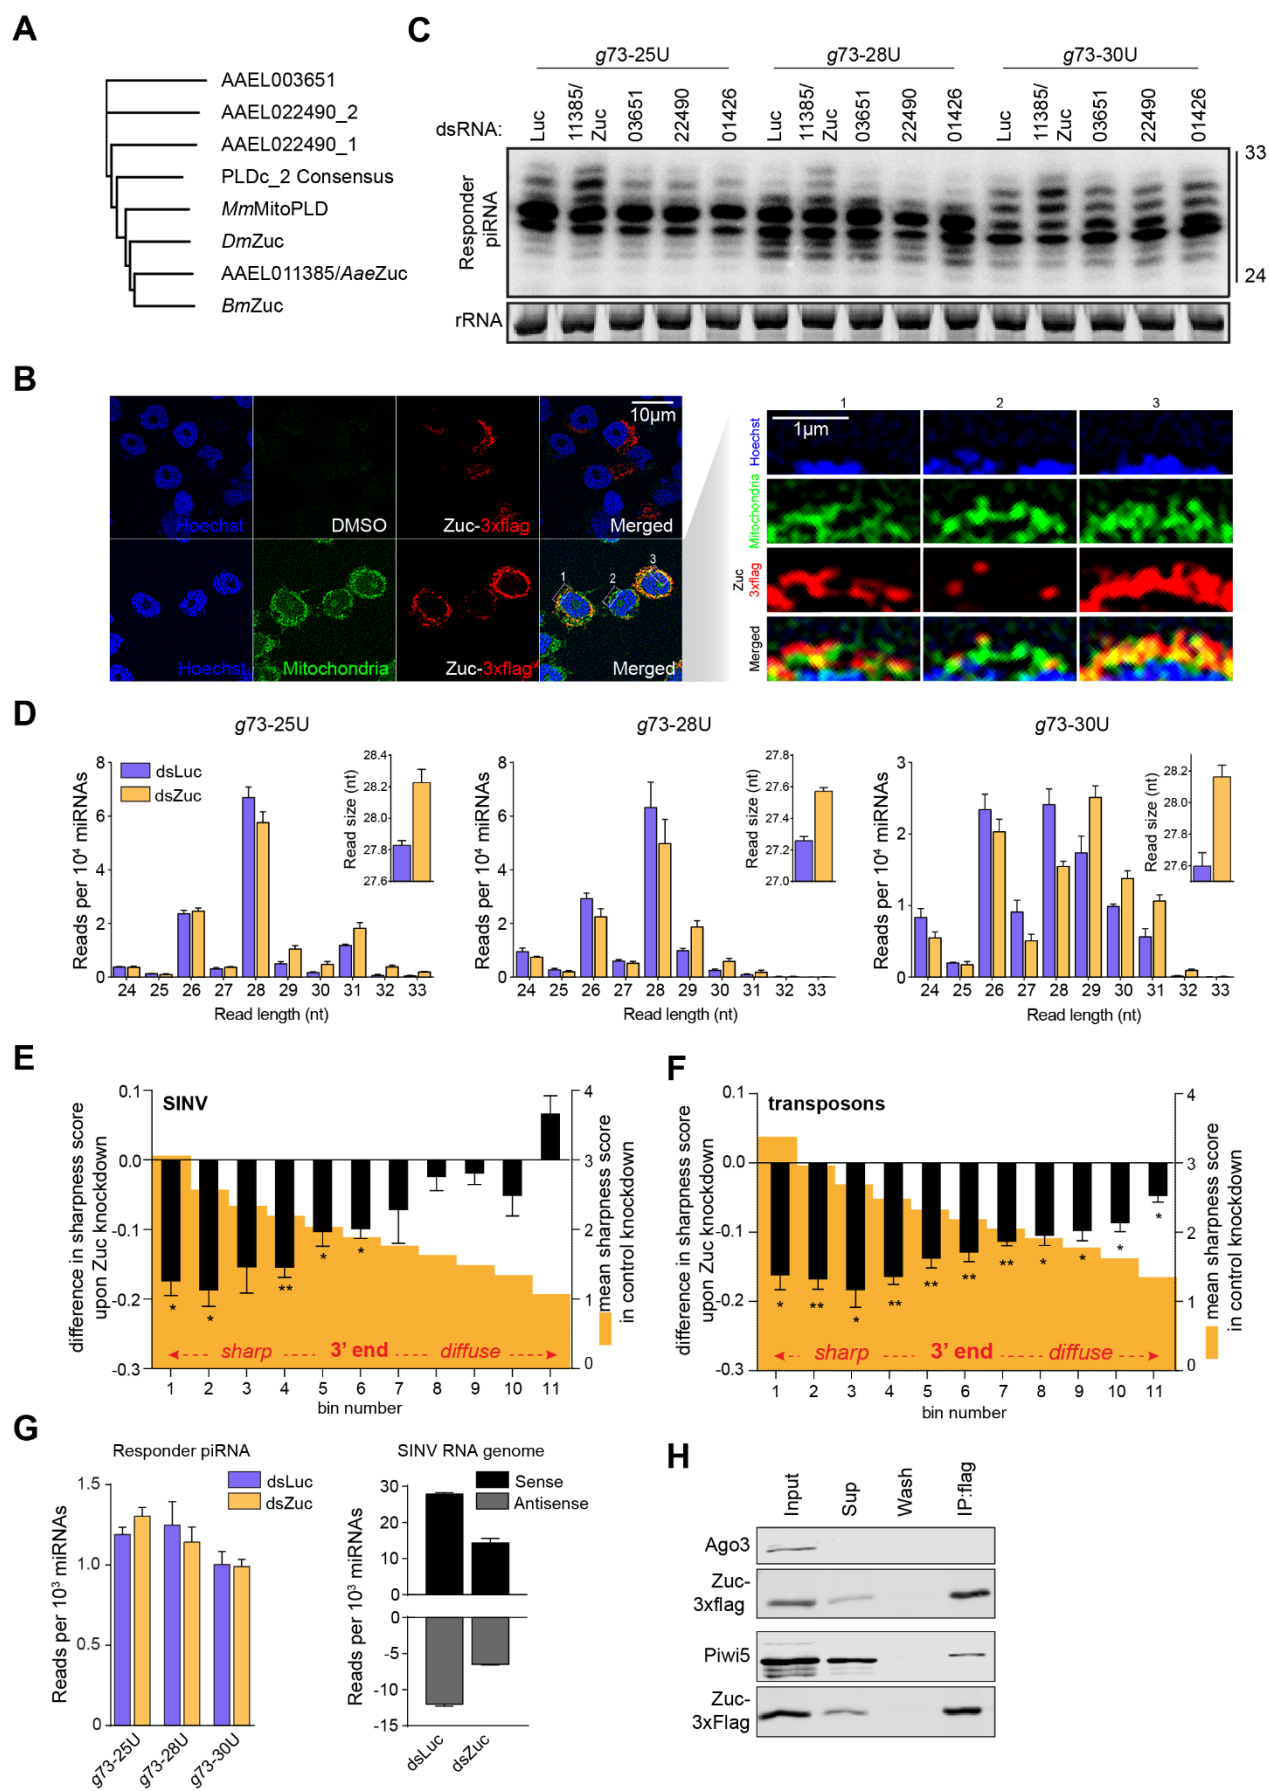



**Figure 4. Zuc-mediated endonucleolytic cleavage defines vpiRNA 3'ends (previous page)**

**(A)** Neighbor joining tree based on PLDc\_2 domains from the PFAM database. *Ae. aegypti* PLDc\_2 domain containing proteins and Zuc orthologs from *Drosophila* (*Dm Zuc*), silkworm (*BmZuc*) and mouse (*MmMitoPLD*).

**(B)** Confocal microscopy images of Aag2 cells expressing C-terminally 3xflag tagged Zuc. Mitochondria were stained using Mitoview green. On the right, enlargements of the areas indicated by dashed boxes in the image on the left are shown, with the nuclei oriented at the bottom.

**(C)** Northern blot analysis of viral responder piRNA production in Aag2 cells upon dsRNA-mediated knockdown of *Ae. aegypti* PLDc\_2 domain containing proteins and the PARN ortholog AAEL001426. Numbers indicate the VectorBase gene identifiers (without the AAEL0 prefix). The 24 and 33 nt size markers are inferred from an EtBr stained small RNA marker and rRNA stained. EtBr served as a loading control (same for (F)).

**(D)** Viral responder piRNA (11585(+)) size distribution as determined in small RNA deep-sequencing libraries from dsLuc and dsZuc treated cells. Read counts were normalized to the number of miRNAs in each library. The inset shows the average responder piRNA read size in Luc- and Zuc knockdown libraries. Bars and whiskers represent mean and SD, respectively.

**(E)** Read count of the responder piRNA in the reporter locus (left) and to the SINV genomic RNA (right), which is common for the three reporter viruses, in dsLuc and dsZuc treated Aag2 cells. Bars and whiskers show the mean +/- SD (left graph) and mean +/- SEM (right graph).

**(F)** A sharpness score was attributed to all viral piRNAs upstream of the artificial reporter cassette (see materials and methods). The maximum score ( $\log_2(14) = 3.81$ ) would be reached if 100% of reads that map to an individual piRNA had the same length. For each of the different reporter viruses the sharpness score for the top most 275 piRNAs were analyzed upon control and Zuc knockdown. The piRNAs were ranked according to the score in the control condition and the means within 11 bins of 25 piRNAs were determined (orange shade). The difference of piRNA score upon Zuc knockdown is plotted as mean  $\pm$  SEM. A two-sided student's t-test was applied to each bin, to assess whether its mean was significantly different from zero. The null hypothesis was rejected at  $p < 0.05$ . \*  $P < 0.05$  and \*\*  $P < 0.01$

**(G)** Same as (F), but for transposon piRNAs.

**(H)** Western blot of indicated PIWI proteins in Zuc-3xflag immunoprecipitations (IP) in Aag2 cells.

248

249 proteins (AAEL003651 and -22490) did not affect responder piRNA size (Figure 4C, Figure  
250 S5B), despite very efficient knockdown (88-94% and 96-98% for AAEL003651 and -22490,  
251 respectively, compared to the modest, 58-71% knockdown of AAEL011385/Zuc; Figure  
252 S5C). Because of the reduction in responder piRNA 3' end sharpness upon AAEL011385  
253 knockdown and its mitochondrial localization, we formally identify AAEL011385 as the  
254 functional Zuc ortholog in *Ae. aegypti*.

255 Small RNA deep-sequencing of dsZuc-treated Aag2 cells recapitulated the viral responder  
256 piRNA size distribution seen by northern blotting, with a general increase in piRNA length  
257 upon knockdown of Zuc (Figure 4D). We propose that upon Zuc knockdown, the viral RNA  
258 is cleaved downstream of the uridine residue, either by a hitherto unknown endonuclease or  
259 by piRNA-PIWI ribonucleoprotein complexes, as in *Drosophila* (12). Subsequently, the  
260 responder pre-piRNA may be trimmed, giving rise to mature piRNAs with more diffuse 3' ends  
261 in a Zuc-independent manner.

262 To study the effects of Zuc knockdown on the 3' end sharpness of viral piRNAs outside of  
263 the reporter locus in more detail, we assigned a sharpness score to every individual piRNA,  
264 defined by a shared 5' end (see materials and methods for details). As expected, Zuc  
265 knockdown significantly reduced sharpness scores, especially of those piRNAs that in control  
266 conditions had the sharpest 3' ends and are therefore likely to be the most prominent Zuc  
267 substrates (Figure 4E). The same effect was observed for piRNAs that mapped to transposon  
268 sequences (Figure 4F). Moreover, Zuc knockdown resulted in an overall increase in size of

269 piRNAs produced from sense as well as antisense substrates of various origins, including  
270 retrotransposon subfamilies, mRNAs and viral RNAs (Figure S5F), suggesting that Zuc is  
271 involved in the formation of 3' end of piRNAs from all substrates.

272 We next assessed the global effects of Zuc depletion on vpiRNA levels. While the abundance  
273 of the *g73*-triggered artificial responder piRNA was largely unaffected upon Zuc knockdown  
274 (Figures 4G-left), Zuc depletion reduced the overall vpiRNA production from the SINV  
275 genomic and subgenomic RNA, which is common to the *g73-25U*, *-28U* and *-30U* viruses  
276 (Figure 4G-right).

277 At the heart of the ping-pong amplification machinery in *Ae. aegypti* are two PIWI proteins:  
278 Ago3, which predominantly binds sense piRNAs, and Piwi5, which mainly associates with  
279 antisense piRNAs (24,34). In *Drosophila*, a strong interaction between Zuc and Aub (the  
280 ortholog of Piwi5), as well as weak associations between Zuc and Ago3/Piwi have been  
281 observed (40-42). We thus evaluated the interaction between Zuc and the somatic *Aedes*  
282 PIWI proteins. While we readily detect Piwi5 in Zuc immunoprecipitates, we did not observe  
283 interaction of Zuc with Ago3 (Figure 4H), nor with Piwi4 and -6 (Figure S5E). The interaction  
284 between Zuc and Piwi5 may underlie the comparatively stronger +1U bias observed for  
285 piRNAs derived from antisense transcripts.

286

### 287 **A subset of responder piRNAs undergoes Nibbler-mediated trimming**

288 In *Drosophila*, piRNA 3' ends are generated by the concerted activities of two enzymes: the  
289 endonuclease Zuc (7-9) and the 3' – 5' exonuclease Nbr (12-14). Aside from its role in piRNA  
290 3' end formation, Nbr is required for the trimming of microRNAs (miRNAs) (43,44). We set  
291 out to identify the functional *Ae. aegypti* Nbr ortholog by predicting all DEDDy-type 3' - 5'  
292 exonuclease domain-containing proteins, which were used in a phylogenetic analysis along  
293 with *Drosophila* Nbr (*DmNbr*). This analysis identified AAEL005527 as a one to one ortholog  
294 of *DmNbr* (Figure 5A). To verify that AAEL005527 is indeed the functional orthologue of  
295 *Drosophila* Nbr, we assessed the effect of its depletion on trimming of two miRNA with  
296 heterogeneous 3' ends in *Ae. aegypti*: miR-34-5p and miR-184 (45,46). It has previously been  
297 shown that miR-34-5p undergoes extensive Nbr-mediated trimming in *Drosophila* (43,44).  
298 Indeed, knockdown of AAEL005527 significantly reduced trimming of both miR-34-5p and  
299 miR-184 (Figure 5B), confirming that AAEL005527 is indeed the functional ortholog of  
300 *Drosophila* Nbr.

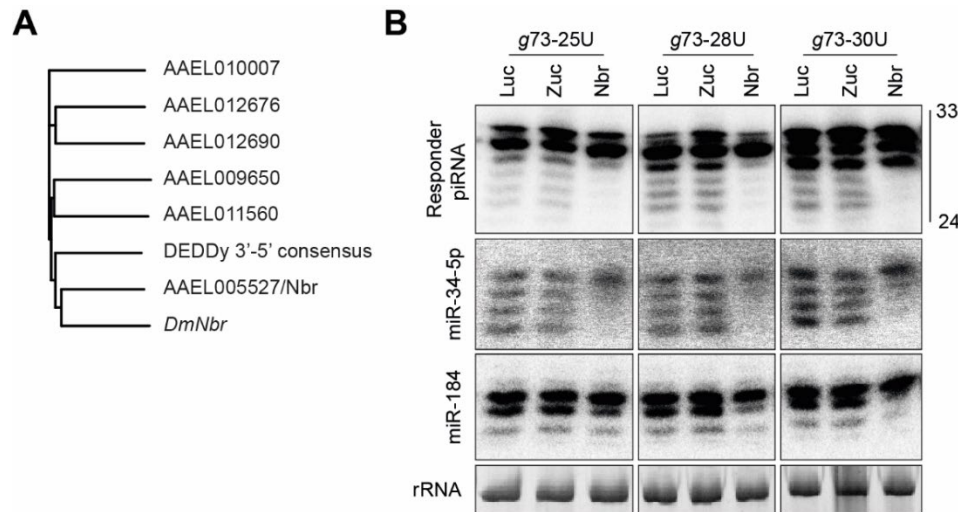

**Figure 5. A subset of responder piRNAs undergoes Nbr-mediated trimming**

**(A)** Neighbor joining tree based on the DEDDy 3' - 5' exonuclease domains identified in *Ae. aegypti*, along with the DEDDy consensus sequence (CDD) and the exonuclease domain of *DmNbr*.

**(B)** Northern blot analyses of viral responder piRNAs in Aag2 cells in which Zuc and *AaeNbr* knockdown was established. miR-34-5p and miR-184 are two miRNAs with heterogenous 3' ends in *Ae. aegypti*. mir-34-5p has been shown to undergo Nbr-mediated trimming in *Drosophila* (43,44).

301

302 To evaluate the role of exonucleolytic trimming on responder vpiRNA 3' end formation in *Ae.*  
303 *aegypti*, we combined Nbr knockdown with infection using the *g73*-targeted reporter viruses.  
304 Knockdown was efficient and did not have major effects on viral RNA levels (Figure S6A-B).  
305 Interestingly, for all viruses tested, Nbr knockdown results in a specific loss of shorter (<27  
306 nt) responder piRNA isoforms, but had no effect on larger isoforms (Figure 5B, Figure S6C).  
307 A similar reduction of shorter piRNA isoforms upon Nbr knockdown has previously been  
308 observed in *Drosophila* (13,14). These findings suggest that mosquito Nbr may trim pre-  
309 piRNAs generated through a Zuc-mediated endonucleolytic cut, but that only a minor fraction  
310 of such pre-piRNAs undergo trimming. Nbr-mediated trimming may be a general hallmark of  
311 aging piRNAs, as has recently been proposed for miRNAs (47).

312 The 3' - 5' exonucleases PNLDC1 and PARN-1 are responsible for trimming of piRNA 3' ends  
313 in *B. mori* and *C. elegans*, respectively (48,49). While PNLDC1 is not conserved in *Ae.*  
314 *aegypti*, a clear mosquito ortholog of PARN-1 can be identified: AAEL001426. Knockdown of  
315 this gene however, had no effect on responder piRNA 3' end formation in our viral reporter  
316 system (Figure 4C, Figure S5B).

317

### 318 **Targeting by an endogenous piRNA triggers trailer piRNA production.**

319 While *Ae. aegypti* displays strong signatures of phased piRNA production (7), it is currently  
320 unknown whether *de novo* produced RNA from cytoplasmic viruses is processed similarly



321 through piRNA phasing. This is especially interesting as the genomes of *Ae. aegypti* and *Ae.*  
322 *albopictus* mosquitoes contain large amounts of endogenous viral elements (EVEs). These  
323 non-retroviral sequence elements are enriched in piRNA clusters and, accordingly, give rise  
324 to abundant piRNAs (26), which may guide the slicing of cognate RNA from acutely infecting  
325 viruses. It has been recently shown that piRNAs derived from EVEs are indeed able to target  
326 and inhibit newly infecting viruses (31-33), yet, it remains unknown whether piRNA phasing  
327 may serve as a mechanism to expand the vpiRNA pool after an initial cleavage by an  
328 endogenous, possibly EVE-derived, piRNA.

329 Hence, we employed our viral reporter system to explore whether targeting by a genomically  
330 encoded piRNA may trigger phased piRNA biogenesis from an acutely infecting virus. To this  
331 end, we introduced an additional non-coding RNA sequence downstream of the *g73*- and  
332 FV53-derived initiator piRNA target sites, which we termed the trailer cassette. To direct  
333 sequential Zuc-mediated endonucleolytic cleavage, this cassette contains uridine residues at  
334 regularly spaced intervals in an RNA sequence that is otherwise devoid of uridines (U interval  
335 viruses, schematically shown in Figure 6C and Figure S7C). As a control, these uridines were  
336 replaced by adenosine residues to create a trailer cassette completely devoid of uridines (U  
337 desert viruses). In Aag2 cells infected with the *g73* interval virus, we detected the first trailer  
338 piRNA using northern blotting (Figure 6A). Interestingly, we also observed the production of  
339 the first trailer piRNA in cells infected with the *g73* desert virus (Figure 6A), suggesting a  
340 downstream uridine residue is not required for trailer piRNA production in *Ae. aegypti*. Trailer  
341 piRNA production from viruses targeted by the FV53 EVE-derived piRNA was also observed  
342 regardless of the presence of uridine residues in the trailer cassette (Figure S7A).  
343 Importantly, while viral RNA levels were similar (Figure 6B), no trailer piRNA production was  
344 observed in cells infected with viruses containing a scrambled target site or viruses lacking a  
345 trailer cassette (*g73*-28/FV25-28), indicating that, as expected, trailer piRNA production  
346 depends on initial targeting by the endogenous piRNA.

347 To assess phased piRNA biogenesis beyond the first trailer piRNA, we deep sequenced  
348 small RNAs produced in Aag2 cells infected with interval and desert viruses, as well as their  
349 respective scrambled control viruses. Mapping piRNAs to the trailer cassette reveals  
350 production of additional piRNAs in cells infected with the *g73*- and FV53-derived piRNA  
351 targeted viruses (Figure 6D, Figure S7D). Significantly fewer piRNAs were produced from the  
352 trailer cassette in viruses containing a scrambled target site. In contrast, vpiRNA production

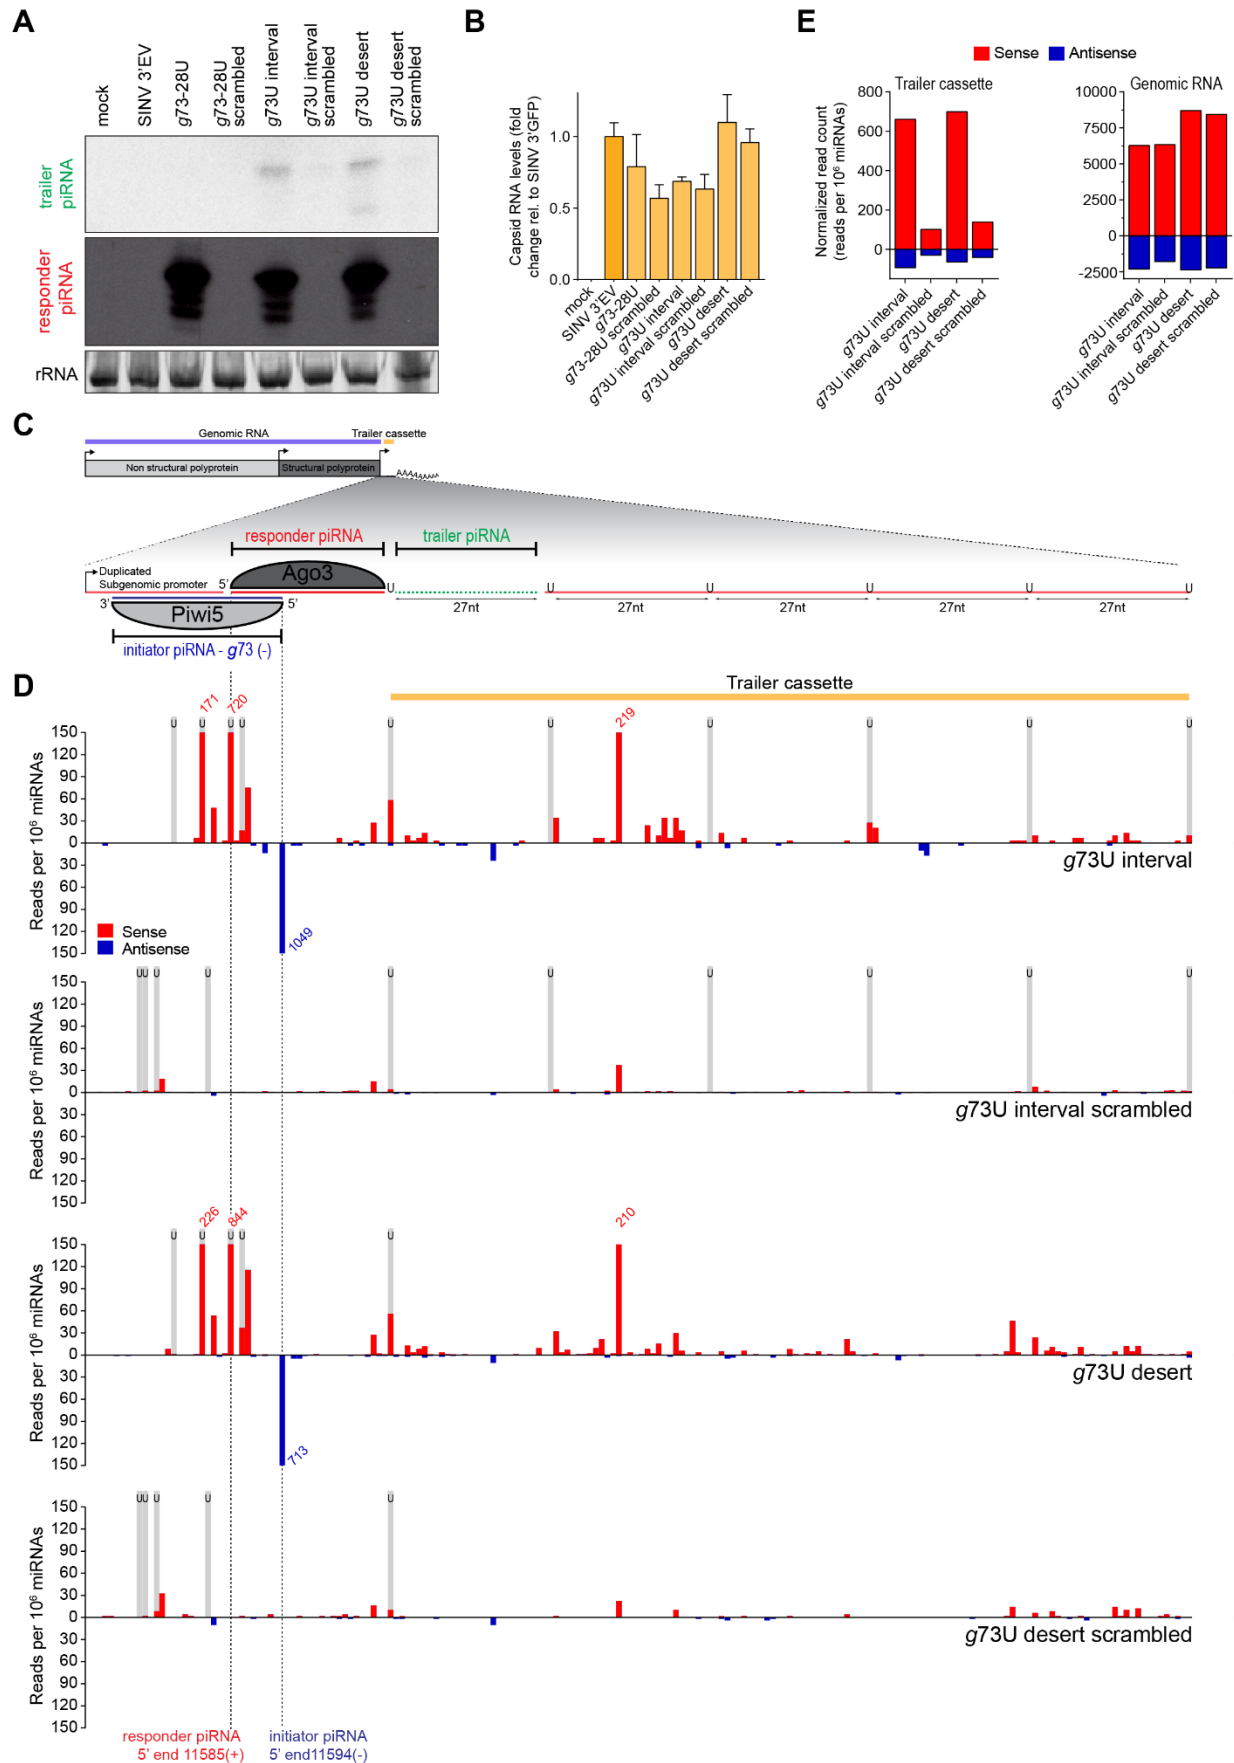

**Figure 6. Targeting of viral RNA by an endogenous piRNA triggers trailer piRNA production (previous page).**

**(A)** Northern blot analysis of the production of the first trailer piRNA from indicated viruses. As a control, the target site was scrambled to abolish targeting by the *g73*-derived piRNA. The remainder of the responder piRNA site as well as the trailer cassette are identical to the respective non-scrambled U interval and U desert viruses. As additional controls, a virus bearing an intact target site, but no trailer cassette (*g73*-28U), and a virus that contains no insert (SINV 3' EV) were used. The general structure of the *g73* U interval virus is shown schematically in (C). rRNA stained with EtBr serves as a loading control.

**(B)** RT-qPCR analyses of viral capsid RNA production in Aag2 cells infected with indicated viruses. All data are shown as a fold change relative to cells infected with a control virus lacking any insert (SINV 3' EV). Bars and whiskers show the mean and SD, respectively.

**(C)** Schematic overview of the *g73* U interval reporter virus. The inset shows a magnification of the non-coding reporter RNA expressed under control of the second subgenomic promoter. This reporter RNA contains a target site for a Piwi5-bound *g73*-derived initiator piRNA, which guides the production of an Ago3-associated responder piRNA. The downstream sequence makes up the trailer cassette and either contains regularly spaced uridine residues (*g73*U interval) or is completely devoid of uridine residues (*g73*U desert). Indicated in green is the first trailer piRNA, which was detected in (A).

**(D)** Normalized counts (in reads per  $10^6$  miRNAs) of piRNA 5' ends mapping to the initiator piRNA target site and trailer cassette of indicated viruses. 5' ends of initiator and responder piRNA are indicated by dashed lines. Numbers indicate counts that exceed the range of the y-axis and black boxes indicate the position of uridine residues. The position of uridine residues is indicated in grey.

**(E)** Total number of normalized sense (red) and antisense (blue) piRNA-sized (24-33 nt) reads mapping to the trailer cassette (left) and genomic RNA (right) of the indicated viruses. The areas of virus denoted as the trailer cassette and genomic RNA are shown in yellow and blue in (C).

353

354 from the SINV genome upstream of the artificial reporter and trailer cassettes is unaltered  
355 (Figure 6E, Figure S7E), indicating that there are no differences in sensitivity of these viruses  
356 for processing by the vpiRNA biogenesis machinery. As both the pattern and level of piRNA  
357 production is highly similar between U interval and U desert viruses (Figure 6D-E, Figure  
358 S7D-E), the presence of uridine residues to guide Zuc-mediated endonucleolytic cleavage  
359 appears to be dispensable for phased production of piRNAs from viral RNA, at least in the  
360 context of this reporter virus.

361

## 362 **Conclusion**

363 Altogether, our results indicate that during acute infection with a cytoplasmic RNA virus,  
364 genomically encoded piRNAs can initiate piRNA production from viral genomic RNA via the  
365 ping-pong amplification loop (Figure S8). The endonucleolytic and exonucleolytic activities of  
366 Zuc and Nbr are involved in maturation of the 3' ends of these newly produced piRNAs.  
367 Moreover, Zuc is also required for 3' end formation of endogenous and viral piRNAs, whereas  
368 Nbr trims miRNAs, like in *Drosophila*. Importantly, cleavage of viral RNA by an endogenous  
369 piRNA triggers the diversification of piRNA sequence pool by piRNA phasing. These findings  
370 suggest that few cleavage events by individual genome-encoded piRNAs are sufficient to  
371 launch a piRNA response of bona fide vpiRNAs.

372

373

374

375

## 376 MATERIALS AND METHODS

### 377 Cell culture, transfection and infection of Aag2 and U4.4 cells

378 *Ae. aegypti* Aag2 and *Ae. albopictus* U4.4 cells were grown in Leibovitz's L-15 medium  
 379 (Invitrogen) supplemented with 10% fetal bovine serum (Gibco), 50 U/ml Penicillin, 50 µg/ml  
 380 Streptomycin (Invitrogen), 1x Non-essential Amino Acids (Invitrogen) and 2% Tryptose  
 381 phosphate broth solution (Sigma) at 25°C. Cell lines were maintained by splitting twice weekly  
 382 according to confluency.

383 For knockdown experiments, ~1×10<sup>6</sup> cells were seeded in 6-wells plates and allowed to  
 384 attach for 16-24 hrs. Subsequently, cells were transfected with gene-specific dsRNA and re-  
 385 transfected 48 hrs later to ensure sustained knockdown. Three hrs after the second  
 386 transfection, cells were infected with indicated viruses at multiplicity of infection (MOI) of 0.1  
 387 and RNA was harvested 72 hrs post infection. In experiments where no knockdown was  
 388 performed, cells were infected 16-24 hrs after seeding at MOI = 0.1, followed by RNA  
 389 extraction at 72 hrs post infection

### 390 Generation of reporter viruses

391 Target sites for initiator piRNAs and reporter responder piRNA were introduced into the  
 392 recombinant Sindbis virus backbone to be expressed from a second subgenomic promoter.  
 393 The previously described SINV-GFP (50,51) was digested using XbaI to remove the GFP-  
 394 gene. The reporter locus was subsequently introduced downstream of the duplicated  
 395 subgenomic promoter by ligation of annealed oligo's (see below), making use of the  
 396 overhangs generated by the XbaI enzyme (initiator piRNA target site in red, downstream  
 397 uridine position is indicated in bold font).

398

| Primer name    | Nucleotide sequence (5' - 3')                                                                              |
|----------------|------------------------------------------------------------------------------------------------------------|
| FW-FV53-25/28U | CTAGAGACCAGGACAGGCAATGAGACTGAGTACACGATTGAGGAGGCGCGAGCACAGACTAGAACAG<br>CAGAACGACGAGCAAAGGCCGGCCGCAGCCT     |
| RV-FV53-25/28U | CTAGAGGCTGCGGCCGCCTTTGCTCGTCGTTCTGCTGTTCTAGTCTGTGCTCGCGCCTCCTCAATCGT<br>GTA CTCA GTCTCATTGCCTGTCCTGGTCT    |
| FW-FV53-28/31U | CTAGAGACCAGGACAGGCAATGAGACTGAGTACACGATTGAGGAGGCGCGAGCACAGACCAGTACA<br>GCAGAACGACGAGCAAAGGCCGGCCGCAGCCT     |
| RV-FV53-28/31U | CTAGAGGCTGCGGCCGCCTTTGCTCGTCGTTCTGCTGTTCTACTGGTCTGTGCTCGCGCCTCCTCAATCGT<br>GTA CTCA GTCTCATTGCCTGTCCTGGTCT |
| FW-FV53-30/33U | CTAGAGACCAGGACAGGCAATGAGACTGAGTACACGATTGAGGAGGCGCGAGCACAGACCAGAATAG<br>CAGAACGACGAGCAAAGGCCGGCCGCAGCCT     |
| RV-FV53-30/33U | CTAGAGGCTGCGGCCGCCTTTGCTCGTCGTTCTGCTATTCTGGTCTGTGCTCGCGCCTCCTCAATCGT<br>GTA CTCA GTCTCATTGCCTGTCCTGGTCT    |
| FW-g73-25U     | CTAGAGACCAGGACAAAGCGCACATACAGTGCAATGTCAGAGCAGGCGCGAGCACAGACTAGAACAG<br>CAGAACGACGAGCAAAGGCCGGCCGCAGCCT     |
| RV-g73-25U     | CTAGAGGCTGCGGCCGCCTTTGCTCGTCGTTCTGCTGTTCTAGTCTGTGCTCGCGCCTGCTCTGACAT<br>TGCACTGTATGTGCGCTTTGTCCTGGTCT      |
| FW-g73-28U     | CTAGAGACCAGGACAAAGCGCACATACAGTGCAATGTCAGAGCAGGCGCGAGCACAGACCAGTACAG<br>CAGAACGACGAGCAAAGGCCGGCCGCAGCCT     |
| RV-g73-28U     | CTAGAGGCTGCGGCCGCCTTTGCTCGTCGTTCTGCTGTTCTACTGGTCTGTGCTCGCGCCTGCTCTGACA<br>TTGCACTGTATGTGCGCTTTGTCCTGGTCT   |
| FW-g73-30U     | CTAGAGACCAGGACAAAGCGCACATACAGTGCAATGTCAGAGCAGGCGCGAGCACAGACCAGAATAG<br>CAGAACGACGAGCAAAGGCCGGCCGCAGCCT     |
| RV-g73-30U     | CTAGAGGCTGCGGCCGCCTTTGCTCGTCGTTCTGCTATTCTGGTCTGTGCTCGCGCCTGCTCTGACAT<br>TGCACTGTATGTGCGCTTTGTCCTGGTCT      |

399

400 To introduce U-interval and U-desert reporter sequences, the g73-28U and FV53-25/28U  
 401 viruses were digested using NotI followed by ligation of annealed oligo's (see below).

402

| Primer name   | Nucleotide sequence (5' - 3')                                                                                               |
|---------------|-----------------------------------------------------------------------------------------------------------------------------|
| FW-U-interval | GGCCTCGCAAGCACAAAGCCGAAGCAGACGAGTCGAACCAGGCAAGCAAAGCGACAACGATAAGCA<br>AAGCAACGGCAAAGCAAGCCAATAACGAAAACAGCAAAGCAGACGAACACTGC |

|               |                                                                                                                              |
|---------------|------------------------------------------------------------------------------------------------------------------------------|
| RV-U-interval | GGCCGCAGTGTTCGTCTGCTTTGCTGTTTTGCTTATTGGCTTGCTTTGCCGTTGCTTTGCTTATCGTTG<br>TCGCTTTGCTTGCTTGGTTTCGACTCGTCTGCTTCGGCTTTGTGCTTGCGA |
| FW-U-desert   | GGCCACGCAAGCACAAAGCCGAAGCAGACGAGACGAACCAGGCAAGCAAAGCGACAACGAAAAGCA<br>AAGCAACGGCAAAGCAAGCCAAAACGAAAACAGCAAAGCAGACGAACACAGC   |
| RV-U-desert   | GGCCGCTGTGTTGCTCTGCTTTGCTGTTTTGCTTTTGGCTTGCTTTGCCGTTGCTTTGCTTTTCGTTG<br>TCGCTTTGCTTGCTTGGTTTCGTCTGCTCTGCTTCGGCTTTGTGCTTGCGT  |

403 Subsequently, viruses were grown as described previously (25).

404

### 405 Mutagenesis of target site mutant viruses

406 Target site mutations were introduced into the g73-28U virus backbone by mutagenesis PCR,  
407 using the primers shown below. PCR-products were DpnI-treated and In-fusion (Takara  
408 Biotech) was using to circularize the plasmid for transformation. After verification of the  
409 sequence by Sanger sequencing, viruses were grown as described previously (25).

410

| Primer name | Nucleotide sequence (5' - 3')     |
|-------------|-----------------------------------|
| FW_mut1-3   | GTCAGACGTGGCGCGAGC                |
| RV_mut1-3   | CGCGCCACGTCTGACATTGC              |
| FW_mut4-6   | AATGTCTCTGCAGGCGCGAG              |
| RV_mut4-6   | GCCTGCAGAGACATTGCACTGT            |
| FW-mut7-9   | TGCAATCAGAGAGCAGGCGC              |
| RV-mut7-9   | TGCTCTCTGATTGCACTGTATGTGC         |
| FW-mut10-11 | CAGTGCATAGTCAGAGCAGGCG            |
| RV-mut10-11 | TCTGACTATGCACTGTATGTGCGC          |
| FW-mut9-12  | CAGTGCTTACTCAGAGCAGGCGC           |
| RV-mut9-12  | TCTGAGTAAGCACTGTATGTGCGCTTTG      |
| FW-mut8-13  | CAGTGGTTACACAGAGCAGGCGCG          |
| RV-mut8-13  | TCTGTGTAACCACTGTATGTGCGCTTTGTC    |
| FW-mut7-14  | CAGTCGTTACAGAGAGCAGGCGCGAG        |
| RV-mut7-14  | TCTCTGTAACGACTGTATGTGCGCTTTGTCTCG |
| FW-mut10-13 | CAGTGGTTAGTCAGAGCAGGCGC           |
| RV-mut10-13 | TCTGACTAACCACTGTATGTGCGCTTTGTC    |
| FW-mut10-15 | CAGACGTTAGTCAGAGCAGGCGCGA         |
| RV-mut10-15 | TCTGACTAACGTCTGTATGTGCGCTTTGTCTCG |

411

### 412 dsRNA production for knockdown experiments

413 Gene-specific PCR products bearing T7 promoter sequences at both ends were *in vitro*  
414 transcribed using T7 polymerase. Either the T7 promoter sequence was introduced directly  
415 with the gene-specific PCR, or a universal GC-rich tag was introduced in the first PCR, to  
416 which the T7 promoter sequence was added in a second PCR. Oligos use to create the T7-  
417 promoter tagged PCR products are shown below (T7 promoter sequence in **bold** font, the  
418 universal GC-rich tag in underlined font):

419

| Primer name         | Nucleotide sequence (5' - 3')                         |
|---------------------|-------------------------------------------------------|
| F-T7-Luc            | <b>TAATACGACTCACTATAGGGGAGATATGAAGAGATACGCCCTGGTT</b> |
| R-T7-Luc            | <b>TAATACGACTCACTATAGGGGAGATAAAACCGGGAGGTAGATGAGA</b> |
| F-T7-Ago3           | <b>TAATACGACTCACTATAGGGGAGATGCTTACTCGTGTGCGGTAG</b>   |
| R-T7-Ago3           | <b>TAATACGACTCACTATAGGGGAGAGGCATGGCAGATCCAATACT</b>   |
| F-T7-Piw4           | <b>TAATACGACTCACTATAGGGGAGACGTTGGAAGTCCCTTCTCTCG</b>  |
| R-T7-Piw4           | <b>TAATACGACTCACTATAGGGGAGATGTCAGTTGATCGCTTCTCAA</b>  |
| F-T7-Piw5           | <b>TAATACGACTCACTATAGGGGAGAGCCATACATCGGGTCAAAT</b>    |
| R-T7-Piw5           | <b>TAATACGACTCACTATAGGGGAGACTCTCCACCGAAGGATTGAA</b>   |
| F-T7-Piw6           | <b>TAATACGACTCACTATAGGGGAGACAACCGGAGATCTTCACGAG</b>   |
| R-T7-Piw6           | <b>TAATACGACTCACTATAGGGGAGAAATCGATGGCTTGATTTGGA</b>   |
| F-GC-AAEL011385/Zuc | <u>GCCCGACGCCAGTGCCTTCGATCG</u>                       |
| R-GC-AAEL011385/Zuc | <u>CGCTCGGCCCGTAATGAGCAACCC</u>                       |
| R-GC-AAEL003651     | <u>GCCCGACGCGTGGTGCCTGCTTCG</u>                       |
| F-GC-AAEL003651     | <u>CGCTCGGCTGCCACATTTGTCCTAAGG</u>                    |
| F-GC-AAEL022490     | <u>GCCCGACGCTTTGCGCCTGTTTCCC</u>                      |
| R-GC-AAEL022490     | <u>CGCTCGGCGATCATCAGGTATCGGTCC</u>                    |
| F-GC-AAEL001426     | <u>GCCCGACGCGACGATTCGCCAAACC</u>                      |
| R-GC-AAEL001426     | <u>CGCTCGGCCCATTTTCTCTTCTTCCG</u>                     |

|                        |                                   |
|------------------------|-----------------------------------|
| R-GC-AAEL005527/AaeNbr | GCCCGACGCCCCCGATAGTGAGCC          |
| F-GC-AAEL005527/AaeNbr | CGCCTCGGCCCAAAGCAGCTGTAAATCC      |
| F-T7-universal primer  | TAATACGACTCACTATAGGGAGAGCCCCGACGC |
| R-T7-universal primer  | TAATACGACTCACTATAGGGAGACGCCTCGGC  |

420

421

## Generation of Piwi5 knockout U4.4 cells

422

Description and characterization of Piwi5 knockout U4.4 cells is described elsewhere (manuscript in prep).

423

424

425

## Phylogenetic analyses

426

427

428

429

430

431

432

433

434

435

436

437

438

439

440

441

442

443

444

## RNA isolation

445

446

447

448

449

## Small RNA northern blotting

450

451

452

453

For small RNA northern blotting, 4-12  $\mu$ g of RNA was size separated by denaturing urea polyacrylamide (15%) gel electrophoresis and transferred to nylon membranes using 1-ethyl-3-(3-dimethylaminopropyl)carbodiimide hydrochloride (EDC) (53).  $^{32}$ P labelled DNA probes (sequences shown below) were used to detect small RNAs.

| Primer name        | Nucleotide sequence (5' - 3')  |
|--------------------|--------------------------------|
| g73-responder:     | TTCTGGTCTGTGCTCGCGCCTGCTCTGACA |
| g73-initiator:     | AAAGCGCACATACAGTGCAATGTCAGAGCA |
| FV53-responder:    | TTCTGGTCTGTGCTCGCGCCTCCTCAATCG |
| Trailer piRNA:     | CTCGTCTGCTTCGGCTTTGTGCTTGCG    |
| miR34-5p:          | CAACCAGCTAACCACACTGCCA         |
| miR184:            | GCCCTTATCAGTTCTCCGTCCA         |
| minimal responder: | CTGGTCTGTGCTCGCGCC             |

454

455

456

457

458

To generate the line graphs shown in Supplementary Figure S5B and S5C, northern blot signals were quantified at the center of each lane. Afterwards, peaks were manually aligned to correct for minor variations in size separation between samples. The average of five neighboring pixels was plotted to smoothen the line graph.



## 459 **Generation of small RNA deep sequencing libraries**

460 Small RNA deep sequencing libraries were generated using the NEBNext Small RNA Library  
461 Prep Set for Illumina (E7560, New England Biolabs), using 1 $\mu$ g RNA as input. As piRNAs  
462 generally have 2'-O-methylated 3' ends, we performed the 3' adapter ligation for 18 hrs at  
463 16°C to enhance the ligation efficiency of small RNAs bearing such modifications. The rest  
464 of the library preparation was performed in accordance with the manufacturers' instructions.  
465 Libraries were sequenced on an Illumina Hiseq4000 machine by the GenomEast Platform  
466 (Strasbourg, France).

## 467 **Small RNA sequencing bioinformatic analyses**

469 RTA 2.7.3 and bcl2fastq were used for image analysis and base calling, and initial quality  
470 control was performed using FastQC. All subsequent manipulations were performed in  
471 Galaxy (54). First, the FASTX Clip adapter software was used to clip 3' adapters from the  
472 small RNA sequence reads. Subsequently, reads were mapped onto the corresponding  
473 recombinant Sindbis virus genomes, transposable element sequences extracted from  
474 TEFAM (<http://tefam.biochem.vt.edu>; downloaded on 10-12-2019), *Ae. aegypti* transcripts  
475 (AaegL5.2 gene set, downloaded from VectorBase) and the Phasi Charoen like virus (PCLV)  
476 genome as sequenced from Aag2 cells (Genbank accession numbers KU936055, KU936056  
477 and KU936057) (55). Reads were mapped using Bowtie allowing 1 mismatch, except for the  
478 mapping to interval and desert viruses and for 3' end sharpness analyses, in which cases no  
479 mismatches were allowed. Small RNA libraries were normalized to the number of reads  
480 mapping to published pre-miRNA sequences deposited in miRBase v.21 without allowing  
481 mismatches.

482 Size profiles were obtained by counting piRNA lengths after mapping with exception of the  
483 size profile of small RNAs obtained after PIWI IP (Figure S2E), for which raw reads prior to  
484 mapping were analyzed from our previously published data (34). For genome distribution  
485 plots, the number of piRNA 5' ends was determined for each position of the sequence to  
486 which small RNAs have been mapped.

487 For the analyses of piRNA production from the area of the non-coding reporter RNA  
488 downstream of the initiator/responder site versus the remainder of the viral genome shown  
489 in Figure 6E and Figure S7E, the SINV genome is defined as the area encoding the non-  
490 structural and structural polyproteins up to the start of the duplicated subgenomic promoter  
491 (nt 1-11385), and the trailer cassette as nt 11610-11753.

492 Sequence data have been deposited in the NCBI sequence read archive under SRA  
493 accession **XXXXX**.

494 To generate heat maps of the length profile of individual piRNAs, published small RNA  
495 sequencing data was re-analyzed (24). SAM files were converted into interval files and  
496 piRNA-sized reads (25-30 nt) were extracted and separated according to the strand they  
497 mapped to. For each individual mapped piRNA species, defined by a shared 5' end, the  
498 frequency of reads of different length was determined. Only piRNAs that were supported by  
499 at least 20 reads were considered for further analyses. The frequency of read lengths per  
500 individual piRNA was imported into Multiple experiment viewer (v 4.9.0; tm4) and k-means  
501 clustering based on Pearson correlation was performed using the indicated number of  
502 clusters and a maximum number of iterations of 500. The 'Construct hierarchical tree' option  
503 was enabled.

504 To analyze nucleotide biases within and downstream of each piRNAs, only piRNA species  
505 that were supported by at least 20 reads and had a dominant piRNA length (at least 75% of  
506 all mapped reads have the same length) were considered. Combining the Get flanks (v1.0.0)



507 and Get genomic DNA (v3.0.3) tools, the genomic sequence 5 nt downstream of that  
508 dominant piRNA length was extracted. Subsequently, each piRNA species was collapsed to  
509 one unique sequence and its corresponding downstream sequence. The sequence logo was  
510 generated from FastA files that contained either these unique piRNA or downstream  
511 sequences. The piRNA logos were cropped in Adobe illustrator to show nucleotide biases of  
512 piRNA positions 1 to 12 and +1 to +5.

513 To analyze the effect of Zuc knockdown on piRNA 3' ends, small RNAs mapping to the SINV  
514 genome up to the subgenomic promotor (nt 1-11385) were considered. For each of the six  
515 datasets (3x dsLuc and 3x dsZuc) available for the g73-25U virus, piRNA species were  
516 extracted by selecting only those piRNA start sites that were supported by at least fifty 25-30  
517 nt reads in the combined six datasets. For these piRNA positions, all reads in the size range  
518 of 25-38 nt were then extracted from the original mapped data. As for the heat map analysis,  
519 the frequency of piRNA lengths was counted for each individual piRNA species. To filter out  
520 noise due to low read count, only the 275 most abundant piRNAs were considered, which  
521 corresponded to approximately 150 reads in the combined six datasets. From this frequency  
522 distribution, a sharpness score was calculated for each individual piRNA species based on  
523 the maximum entropy (all reads have the same length) minus the observed Shannon entropy:  
524  $S_{\text{sharp}} = S_{\text{max}} - S_{\text{obs}} = \log_2(14) - \sum_{n=25}^{38} p_n * \log_2 p_n$  (56). The mean sharpness score for each  
525 piRNA was determined for the three control and Zuc knockdown datasets and the 275  
526 piRNAs were then ranked based on mean sharpness score in the control knockdown from  
527 high score (sharp 3' end) to lower scores (more diffuse 3' end). Within this ranking an average  
528 of the mean sharpness scores was then calculated for 11 bins of 25 individual piRNA  
529 positions each, both for the control and the Zuc knockdown. Finally, the difference in  
530 sharpness score ( $\Delta S_{\text{sharp}}$ ) between control and Zuc knockdown was determined for each bin.  
531 The entire analysis was repeated for the six datasets of the g73-28 and g73-30 viruses and  
532 the data was combined by calculating the mean + SEM of the  $\Delta S_{\text{sharp}}$  per bin obtained for  
533 each type of reporter virus. To determine statistical significance, the  $\Delta S_{\text{sharp}}$  was tested  
534 against the null hypothesis that there is no effect of Zuc knockdown on 3' end sharpness  
535 scores ( $\Delta S_{\text{sharp}} = 0$ ). A two-sided student's t-test was performed per bin and the hypothesis  
536 was rejected at  $p < 0.05$ . The sharpness score analysis for transposon mapping piRNAs was  
537 performed with the 4400 most expressed piRNAs (400 piRNAs per bin).

538

539

## RT-qPCR

540 For RT-qPCR analyses, DNaseI (Ambion)-treated RNA was reverse transcribed using  
541 Taqman reverse transcriptase (Life Technologies) and PCR amplified in the presence of  
542 SYBR green, using the GoTaq qPCR system (Promega) according to the manufacturers'  
543 recommendations. Expression levels of target genes were normalized to the expression of  
544 the housekeeping gene lysosomal aspartic protease (LAP) for *Ae. aegypti* samples or  
545 Ribosomal Protein L5 (RpL5) for *Ae. albopictus* samples and fold changes were calculated  
546 using the  $2^{-\Delta\Delta CT}$  method (57). The following primers were used:

547

| Primer name       | Nucleotide sequence (5' - 3') |
|-------------------|-------------------------------|
| qF-SINV-Capsid    | CTGGCCATGGAAGGAAAGGT          |
| qR-SINV-Capsid    | CCACTATACTGCACCGCTCC          |
| qF-LAP            | GTGCTCATTACCAACATCG           |
| qR-LAP            | AACTTGCCGCAACAATAC            |
| qF-AaI-RpL5       | TCGCTTACGCCCGCATTGAGGGTGAT    |
| qR-AaI-RpL5       | TCGCCGGTCACATCGGTACAGCCA      |
| qF-AAEL011385/Zuc | GATGACCCGTTTGGCC              |

|                   |                          |
|-------------------|--------------------------|
| qR-AAEL011385/Zuc | CATTGGCCACTGCACC         |
| qF-AAEL003651     | CCGTTGTGTTCAACAACC       |
| qR-AAEL003651     | GAGTTAACGGGACGTAATCC     |
| qF-AAEL022490     | CGGAATGCAGCATTCTGATG     |
| qR-AAEL022490     | GTTTCAGCTTTTCGTAGAATTTCC |
| qF-AAEL001426     | GACACAACATGCTGTTGG       |
| qR-AAEL001426     | TGACGGCTTCGAACAC         |

548

### 549 Generation of Zuc expression plasmids

550

The sequence encoding the Zuc protein was amplified from Aag2 cDNA using CloneAmp HiFi PCR Premix (Takara) and cloned into the pAWG vector (The Drosophila Gateway Vector Collection, Carnegie Science) using In-fusion (Takara) technology.

552

The following primers were used to amplify the vector and insert:

553

554

| Primer name | Nucleotide sequence (5' - 3')          |
|-------------|----------------------------------------|
| FW-pAWG-INV | GACCCAGCTTTCTTGTACAAAGTGG              |
| RV-pAWG-INV | GGTGTCTTCTATCTCCTTCGAAGCC              |
| FW-11385 C  | GGAGATAGAAACACCATGATGTTGGAATCTGTGCCACG |
| RV-11385 C  | CAAGAAAGCTGGGTCTGCCTATCTCCCCGATGG      |

555

556

557

558

559

560

Subsequently, pAW3F-Zuc was generated by inverse PCR of pAWG-Zuc, which introduced the 3×flag tag to replace the eGFP-tag, followed by In-fusion cloning (Takara Biotech). The primers used for this inverse PCR are shown below (underlined sequence makes up the 3×flag tag, double underlined sequence is the 15 nt overlap required for In-fusion cloning):

| Primer name    | Nucleotide sequence (5' - 3')                                        |
|----------------|----------------------------------------------------------------------|
| FW_pAW3F-11385 | <u>ATAAGGACGACGATGATAAGGACTACAAGGACGACGACGATAAGCACCGGTCCACGTGACG</u> |
| RV_pAW3F-11385 | <u>CATCGTCGTCCTTATAATCCTTGTATCGTCGTCCTTGTAAATCGGTGGCGGAGCTCACC</u>   |

561

562

### 562 Immunofluorescence

563

564

565

566

567

568

569

570

571

572

573

574

575

576

Approximately  $5 \times 10^5$  Aag2 cells were transfected with 1  $\mu$ g of the pUb-Zuc-3xflag expression vector using 1  $\mu$ L X-tremeGENE HP DNA Transfection Reagent (Roche) according to the manufacturer's instructions. 48 hrs later, cells were fixed on coverslips using 4% paraformaldehyde for 10 minutes at room temperature. Fixed cells were permeabilized in PBS-Triton (0.25%) for 10 minutes and blocked in 10% normal goat serum/0.3M Glycine in PBS-Tween (0.1%). Antibody staining was performed using mouse anti-flag (1:200, Sigma, F1804, RRID: AB\_262044) for 1 hr at room temperature, followed by goat anti-mouse IgG Alexa fluor 568 (1:200, Invitrogen, A-11004, RRID: AB\_2534072) for 1 hr at room temperature. Following antibody staining, mitochondria were stained using 200  $\mu$ M Mitoview Green (Biotium), according to the manufacturer's instruction. Lastly, Hoechst reagent was used to stain the nuclei and the coverslips were mounted onto microscope slides for imaging using the Zeiss LSM900 confocal microscope. In between all steps during the staining procedure, cells were washed three times with PBS.

577

578

### 578 Co-immunoprecipitation and western blot

579

580

581

582

583

For immunoprecipitation of Zuc,  $\sim 4.5 \times 10^6$  Aag2 cells were seeded and after  $\sim 16$  hrs, 15  $\mu$ g of the pAW3F-Zuc was transfected using X-tremeGENE HP DNA Transfection Reagent (Roche) according to the manufacturer's instructions. Cells were lysed 48 hrs after transfection using 300  $\mu$ L lysis buffer (10 mM Tris-HCl pH 7.5, 150 mM NaCl, 0.5 mM EDTA, 0.5% Igepal CA-630 [Sigma], 10% Glycerol, 1x cOmplete Protease Inhibitor [Roche], 1 mM PMSF). After incubation for 1 hr at 4°C with end-over-end rotation, lysates were centrifuged

584 for 30 min at 15000 × g, 4°C. The supernatant was snap-frozen in liquid nitrogen and stored  
585 at -80°C for later use.

586 For immunoprecipitation, 15 µL M2-Flag bead slurry (Sigma) was equilibrated in lysis buffer,  
587 and, along with 450 µL dilution buffer (10 mM Tris-HCl pH 7.5, 150 mM NaCl, 0.5 mM EDTA,  
588 1x cOmplete Protease Inhibitor [Roche], 1 mM PMSF), added to the thawed lysate. After  
589 incubation for 2 hrs at 4°C with end-over-end rotation, beads were washed thrice using 500  
590 µL dilution buffer, before harvesting immunoprecipitates by boiling for 10 min in 20 µL 2×  
591 sample buffer (120 mM Tris/Cl pH 6.8, 20% glycerol, 4% SDS, 0.04% bromophenol blue,  
592 10% β-mercaptoethanol). After boiling, samples were diluted by adding 20 µL lysis buffer.  
593 Samples were resolved on 10% polyacrylamide gels and blotted to nitrocellulose  
594 membranes. The following antibodies, generated in our laboratory, were used for western  
595 blotting: rabbit-anti-Ago3, -Piwi4, -Piwi5 and -Piwi6 (all at 1:500) (34,58). Additionally, mouse  
596 anti-flag (1:1000, Sigma, F1804, RRID: AB\_262044) was used. Secondary antibodies were  
597 goat-anti-rabbit-IRdye800 [Li-cor; 926-32211, RRID: AB\_621843] and goat-anti-mouse-  
598 IRdye680 [926-68070, RRID: AB\_10956588].  
599

## 600 **ACKNOWLEDGEMENTS**

601 We thank the members of the laboratory for critical discussion of this manuscript.  
602 Furthermore, we thank Bas Pennings for his help with cloning experiments. This work was  
603 financially supported by a Consolidator Grant from the European Research Council under the  
604 European Union's Seventh Framework Programme (grant number ERC CoG 615680) and a  
605 VICI grant from the Netherlands Organization for Scientific Research (grant number  
606 016.VICI.170.090).

607

608 **SUPPLEMENTARY MATERIAL**

609 **Figure S1**

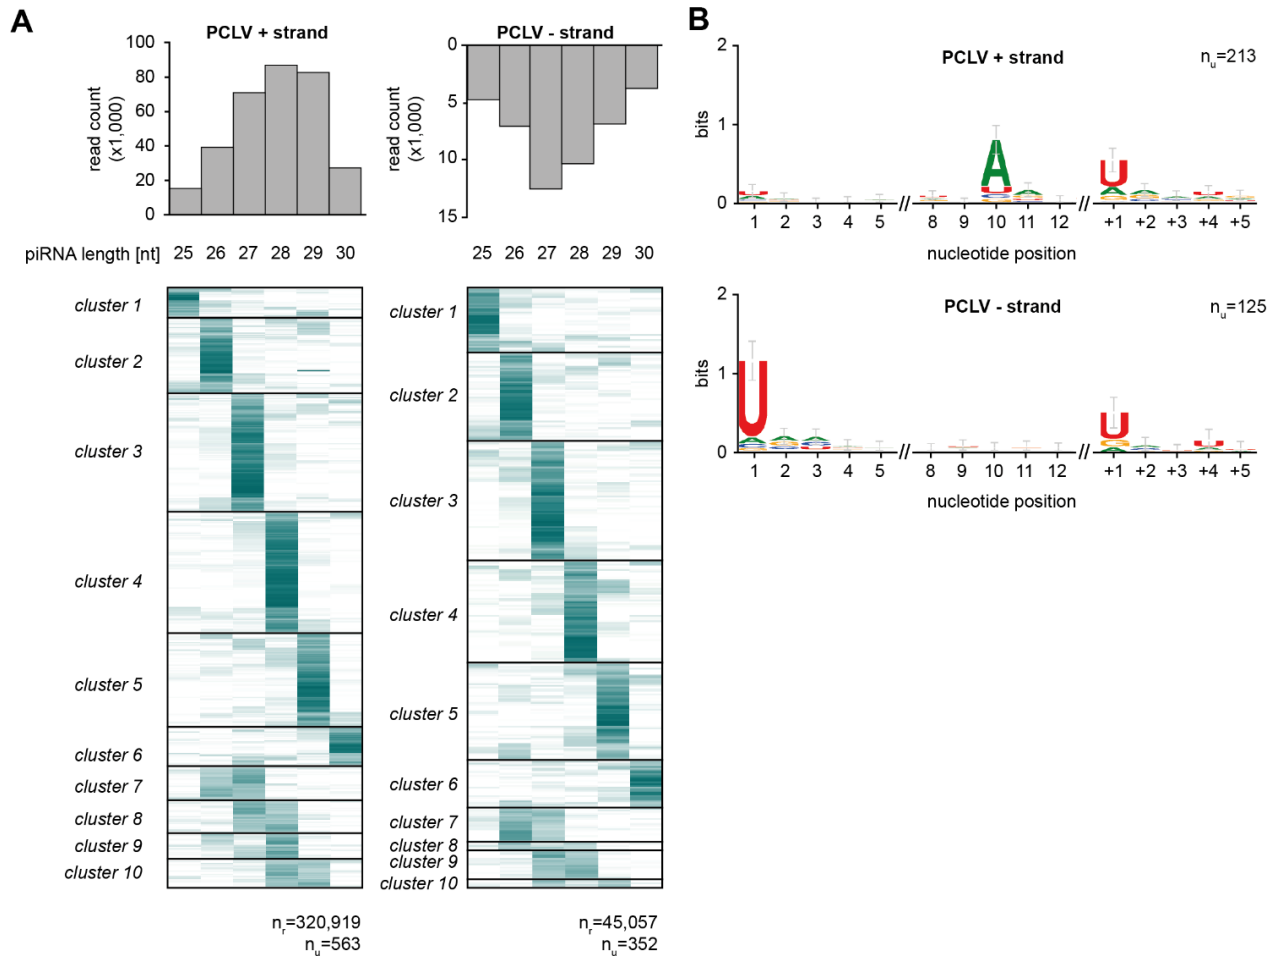

**Figure S1. PCLV-derived piRNAs have sharp 3' ends**

**(A)** Heat map showing the relative size distribution of individual piRNAs (defined by a shared 5' end) mapping to the genome of Phasi Charoen-like virus (PCLV). Shades of blue indicate the percentage of reads contributing to the indicated read length, white represents absence of reads of a specific size. The number of unique piRNAs ( $n_u$ ) and the number of reads ( $n_r$ ) that underlie the heat map are indicated. A minimum of 20 reads/unique piRNA was required to be included in the analysis.

**(B)** Nucleotide biases for the indicated nucleotide positions of PCLV-derived piRNAs and a downstream region. Only piRNAs from (A) that had a dominant length (determined by at least 75% of reads) were considered in this analysis and all reads were collapsed to unique sequences. The downstream region (+1 until +5) shows the bias at the genomic region downstream of the dominant piRNA sequences.

611 **Supplementary text and Figure S2**

612 **An EVE-derived piRNA has the potential to trigger responder piRNA production.**

613 Apart from the *g73* piRNA triggered reporter virus described in the main text, we generated  
614 a second set of viruses bearing target sites for an abundant Piwi5-associated piRNA derived  
615 from an EVE of flaviviral origin (FV53 (26), Figure S2A). As the target site for the FV53-  
616 derived initiator piRNAs can be recognized by two piRNA isoforms that align at their 3' end  
617 and differ 3 nt in size, target cleavage may result in the production of two Ago3-bound  
618 responder piRNAs isoforms that have an offset of 3 nt (Inset in Figure S2A).

619 Similar to the *g73* target site bearing viruses (Figure 2B), responder piRNA 3' end sharpness  
620 is moderately reduced as a function of increased distance between the initiator piRNA  
621 cleavage site and the first downstream uridine residue (Figure S2B), suggesting a role for  
622 exonucleolytic trimming in responder piRNA maturation.

623 For all viruses tested here, we observe abundant responder piRNAs as well as the production  
624 of a first trailer piRNA (indicated with yellow arrowheads in Figure S2C). As the trailer piRNA  
625 5' ends perfectly overlap with the uridine residue, we propose that this residue guides  
626 cleavage of the viral RNA, simultaneously generating the responder pre-piRNA 3' end and  
627 the trailer piRNA 5' end.

628 Aside from these responder and trailer piRNAs, additional abundant sense piRNAs are  
629 produced from the sequence upstream of the initiator piRNA slice site (Figure S2C),  
630 suggesting that other, partially complementary, initiator piRNAs may target the sequence and  
631 instruct production of these additional sense piRNAs.

632

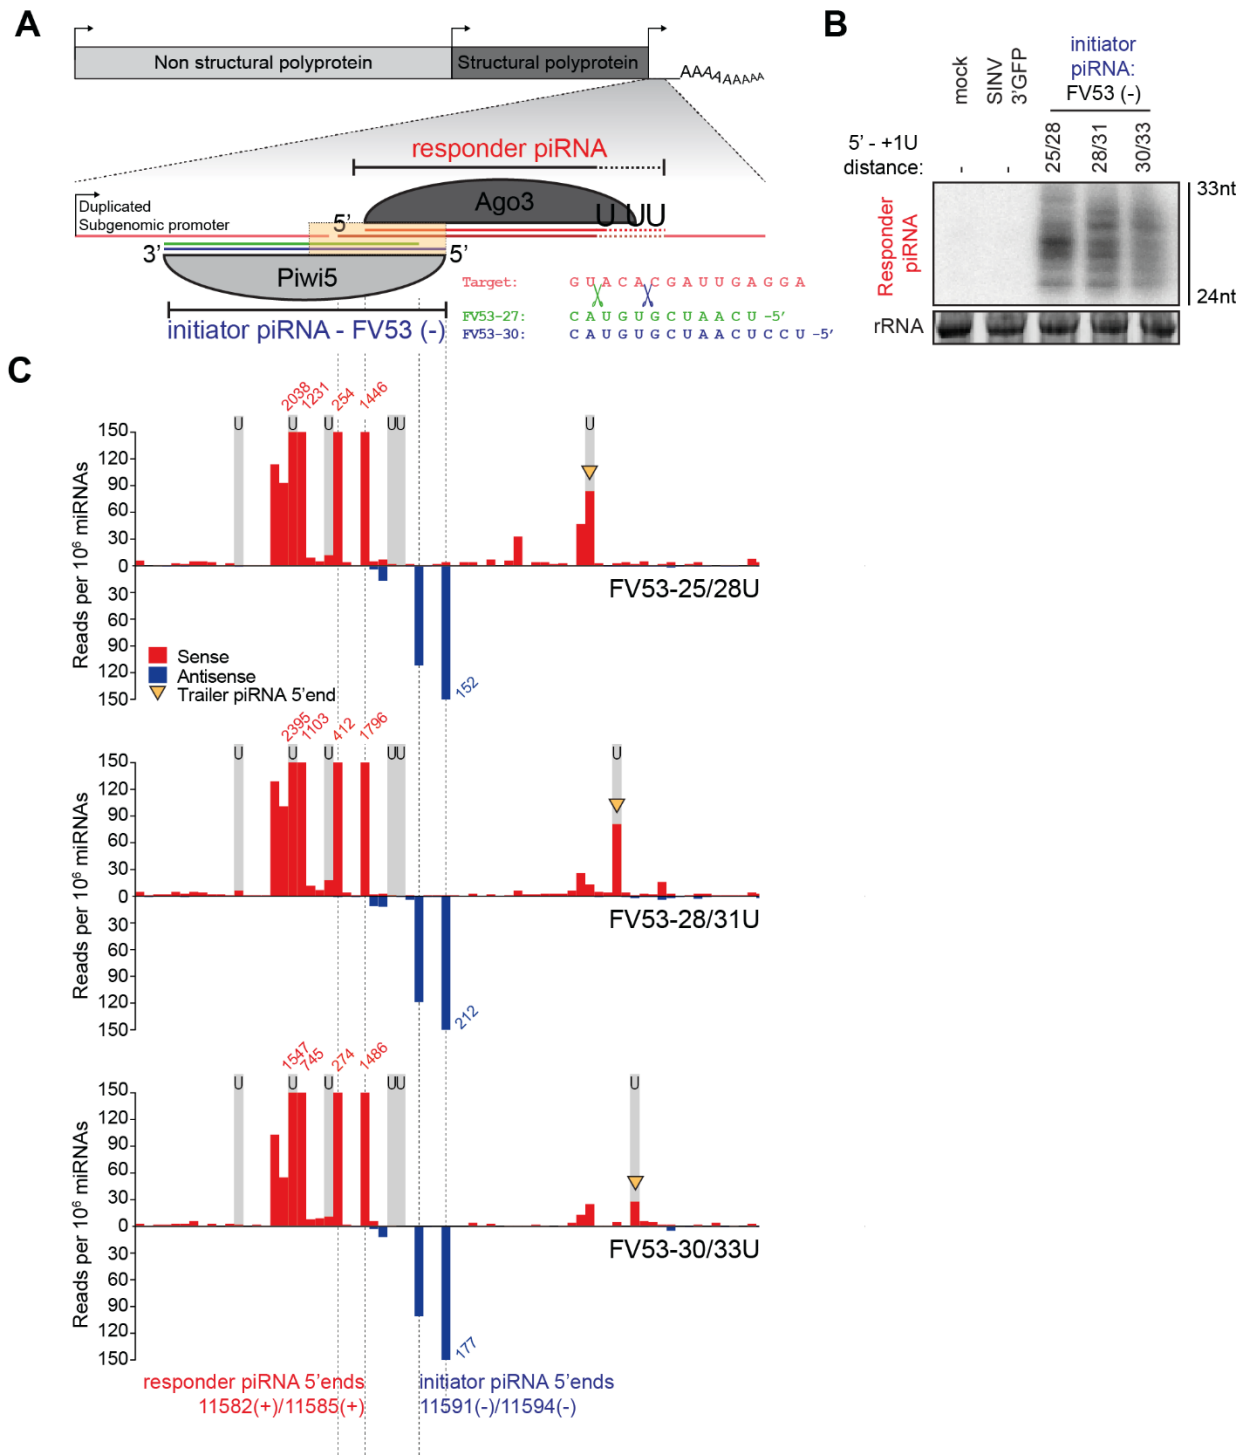

**Figure S2. An EVE-derived piRNA triggers responder piRNA production from an acutely infecting virus RNA**

**(A)** Schematic depiction of the SINV-based viral reporter system in which responder piRNA production is triggered by an initiator piRNA derived from an endogenous viral element (FV53). As the Piwi5-associated FV53 initiator piRNA is expressed as two isoforms that align at their 3' end (blue and green lines), endonucleolytic cleavage may generate two Ago3-bound responder piRNAs (red lines) that differ 3 nt in size. The inset shows a part of the viral target RNA (red), the 5' ends of the two FV53-piRNA isoforms (27-mer: green and 30-mer: blue) and the scissors represent their respective slice sites (green and blue).

**(B)** Northern blot analysis of responder piRNAs produced in Aag2 cells infected with indicated FV53-targeted reporter viruses. 24 and 33 nt size markers are inferred from EtBr staining of a small RNA marker, and EtBr stained rRNA serves as loading control.

**(C)** Visualization of 5' ends of sense (red) and antisense (blue) piRNAs (24-33 nt) mapping to the non-coding reporter RNA sequence. Predicted initiator and responder piRNA 5' ends are indicated by dashed lines and positions of uridine residues on the sense strand are denoted by light grey shading. Red and blue numbers indicate read counts (per  $10^6$  miRNAs) at positions where they exceed the y-axis range and yellow arrowheads indicate 5' ends of putative trailer piRNAs.

633 **Figure S3**

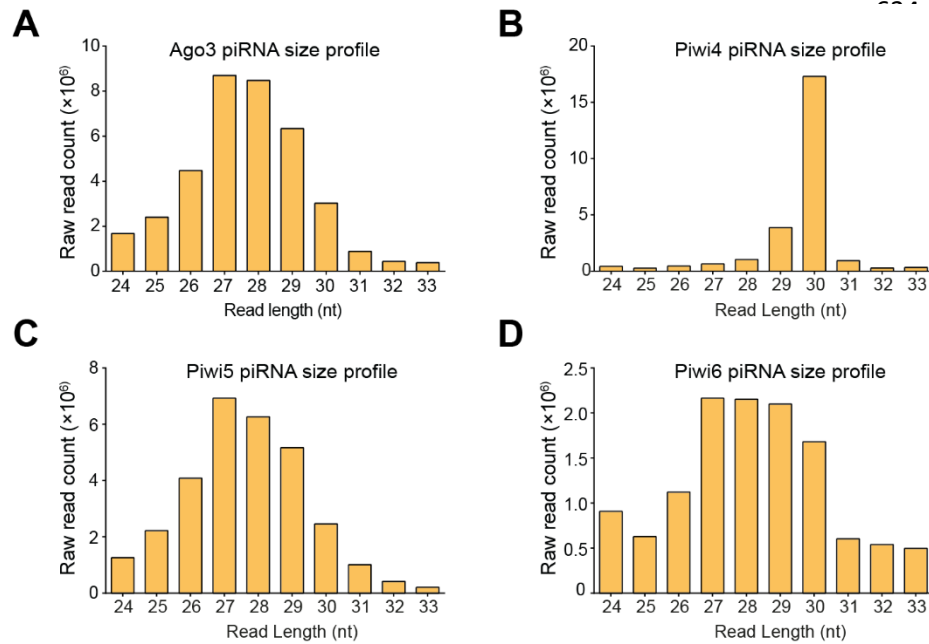

**Figure S3. Size preferences of somatically expressed PIWI proteins**

Size distribution of piRNA-sized (24-33 nt) small RNA reads in Ago3- (A), Piwi4- (B), Piwi5- (C), and Piwi6-IP (D) sequencing libraries. Piwi4-IP is dominated by two very abundantly expressed piRNAs (tapiR1/2- 30 and 29 nt in size, respectively), that are involved in the degradation of maternally provided transcripts during embryonic development in mosquitoes (58). Counts are raw, unmapped reads from our previously published data (34,58).



635 **Figure S4**

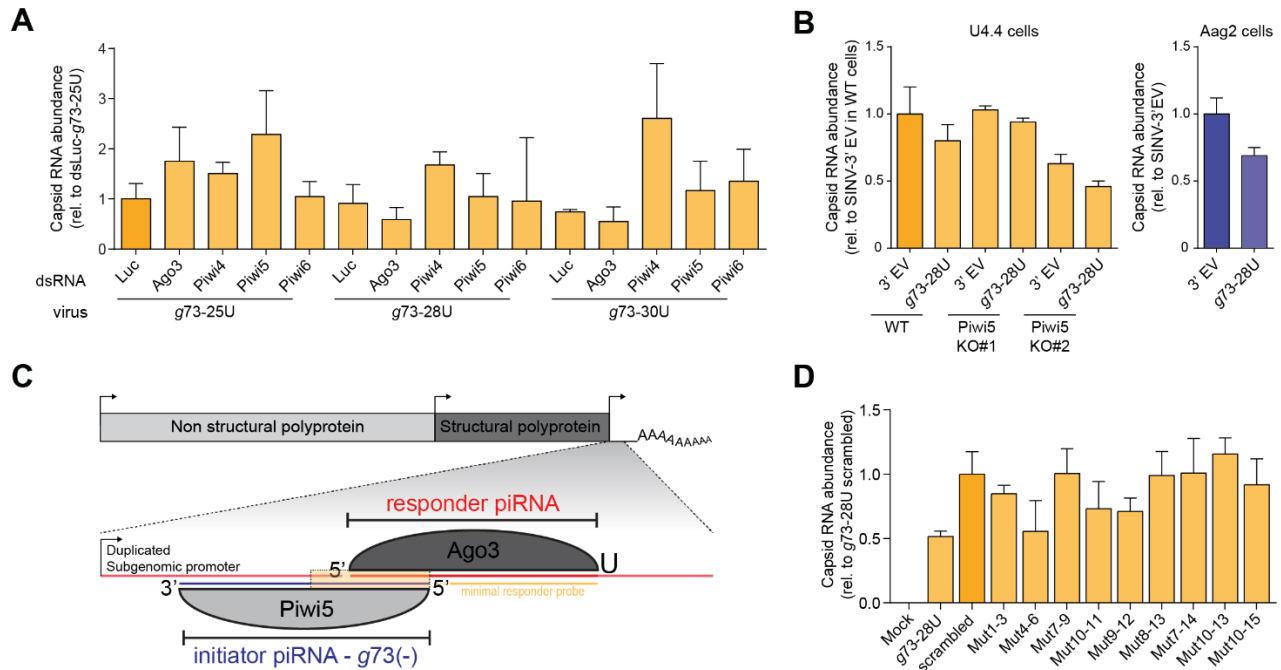

**Figure S4. PIWI-knockdown does not affect virus replication**

**(A)** RT-qPCR analyses of subgenomic capsid RNA abundance in the samples used in Figure 3A. RNA levels are shown as a fold change relative to dsLuc treated cells infected with *g73-25U*. Bars and whiskers show the mean and standard deviation (SD), respectively (same for B and D).

**(B)** RT-qPCR analyses of capsid RNA abundance in the indicated U4.4 (yellow) and Aag2 (blue) samples used in Figure 3B. Values shown are fold changes relative to WT cells infected with the SINV 3' EV control virus.

**(C)** Schematic representation of the *g73-28U* virus that was used to study the effect of target site mutations on responder piRNA production. Yellow shading indicates the area that is shown in Figure 3C.

**(D)** RT-qPCR analyses of capsid RNA levels in samples used in Figure 3D. All data are normalized to cells infected with the *g73-28U* scrambled virus.

636 **Figure S5**

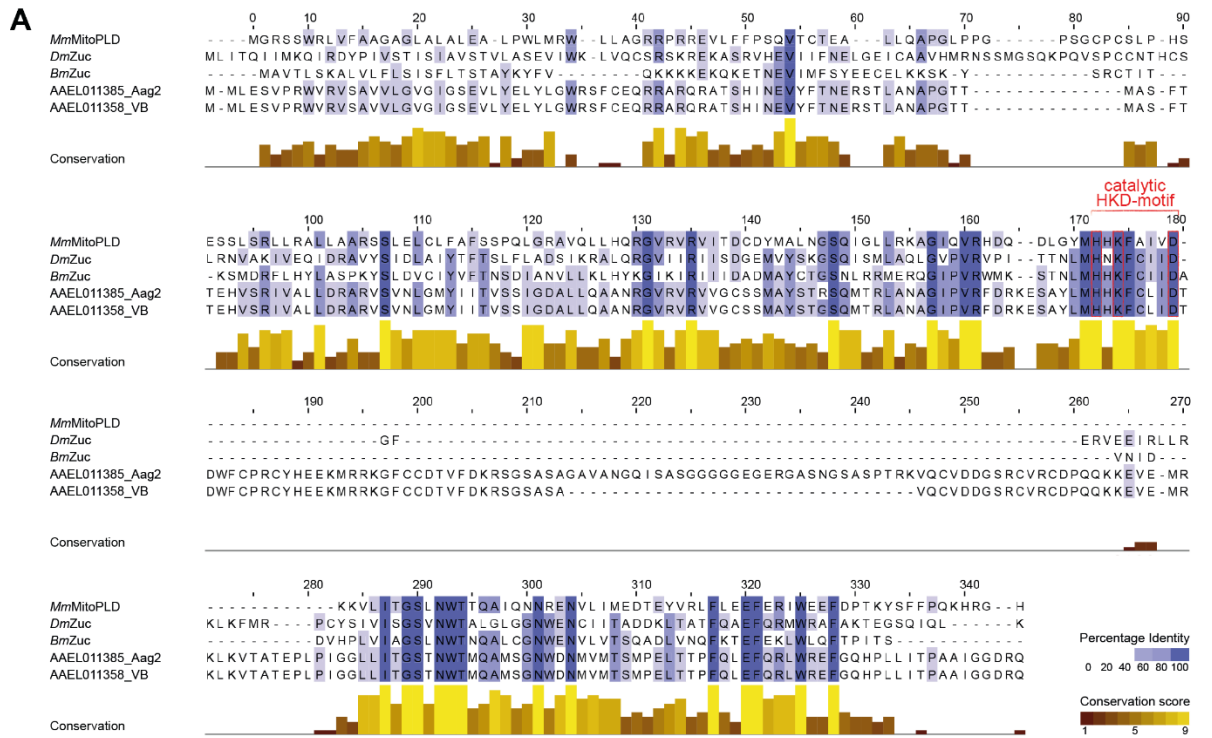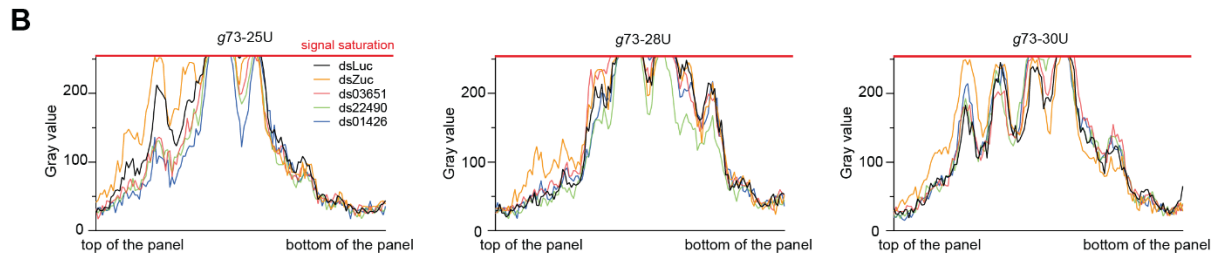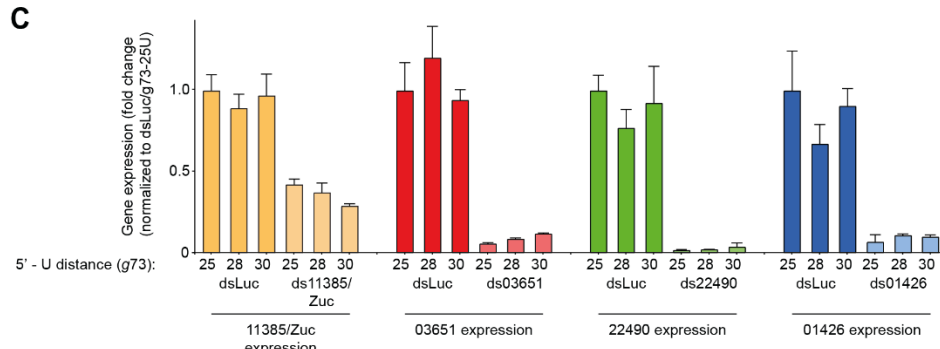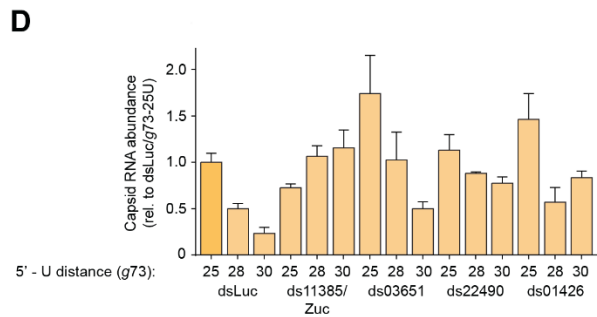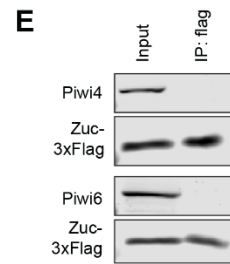

F

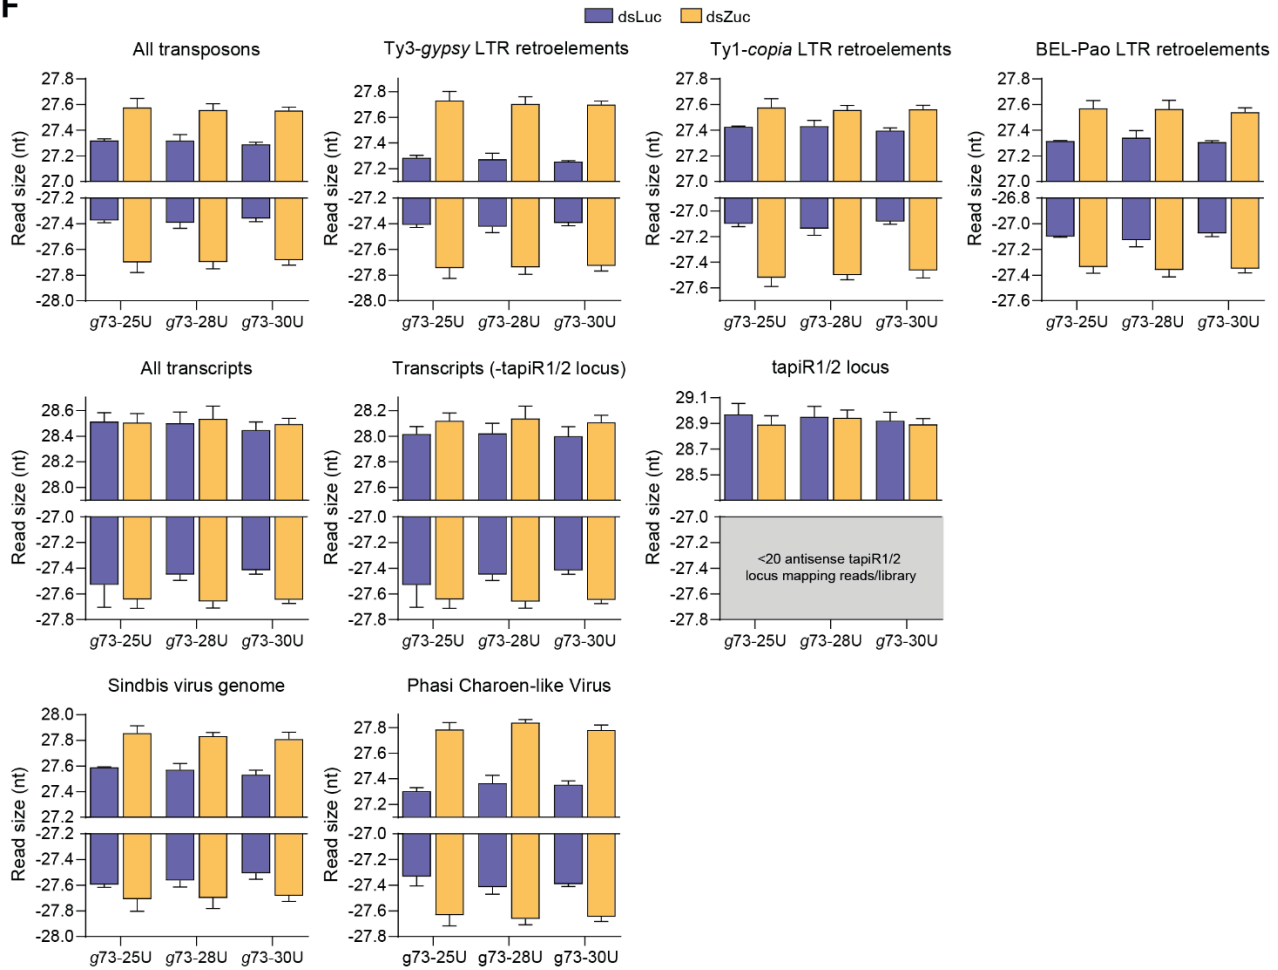

**Figure S5. Mosquito Zuc is involved in 3' end formation of piRNAs from various substrates**

(A) Multiple sequence alignment of Zucchini orthologs from *D. melanogaster* (*DmZuc*), *B. mori* (*BmZuc*) and *M. musculus* (*MmMitoPLD*), and AAEL011385 as annotated in VectorBase (VB) and as sequenced from Aag2 cells. Residues shaded in blue are shared between  $\geq 3$  of the proteins, and the brown-yellow bars indicate conservation of physicochemical properties at each position.

(B) Quantification of the responder piRNA signal from the northern blot in Figure 4B, showing the responder piRNA size shift upon Zuc knockdown, analyzed for the three *g73*-derived piRNA targeted viruses separately. The X-axis represents the position on the northern blot from top to bottom, the Y-axis shows responder piRNA signal intensity.

(C-D) RT-qPCR analyses of the knockdown efficiency of indicated genes (C) and viral capsid RNA levels (D). Gene expression levels are shown as fold change relative to dsLuc treated cells infected with the *g73*-25U virus. Bars and whiskers depict mean and SD, respectively.

(E) Western blot analyses of Piwi4 and Piwi6 in the same Zuc-3xflag-IP material that was used in Figure 4H.

(F) Average size of piRNAs (24-33 nt) derived from the indicated substrates in small RNA deep sequencing libraries of dsLuc and dsZuc treated Aag2 cells. The length profile of two piRNAs (*tapiR1/2*) involved in degradation of maternal transcripts during embryogenesis (58), is not affected by Zuc knockdown, suggesting that they are generated through an Zuc-independent, non-canonical mechanism. As virtually no antisense reads map to the *tapiR1/2* locus, these data are not shown. Bars and whiskers represent mean and SD, respectively.

638 **Figure S6**

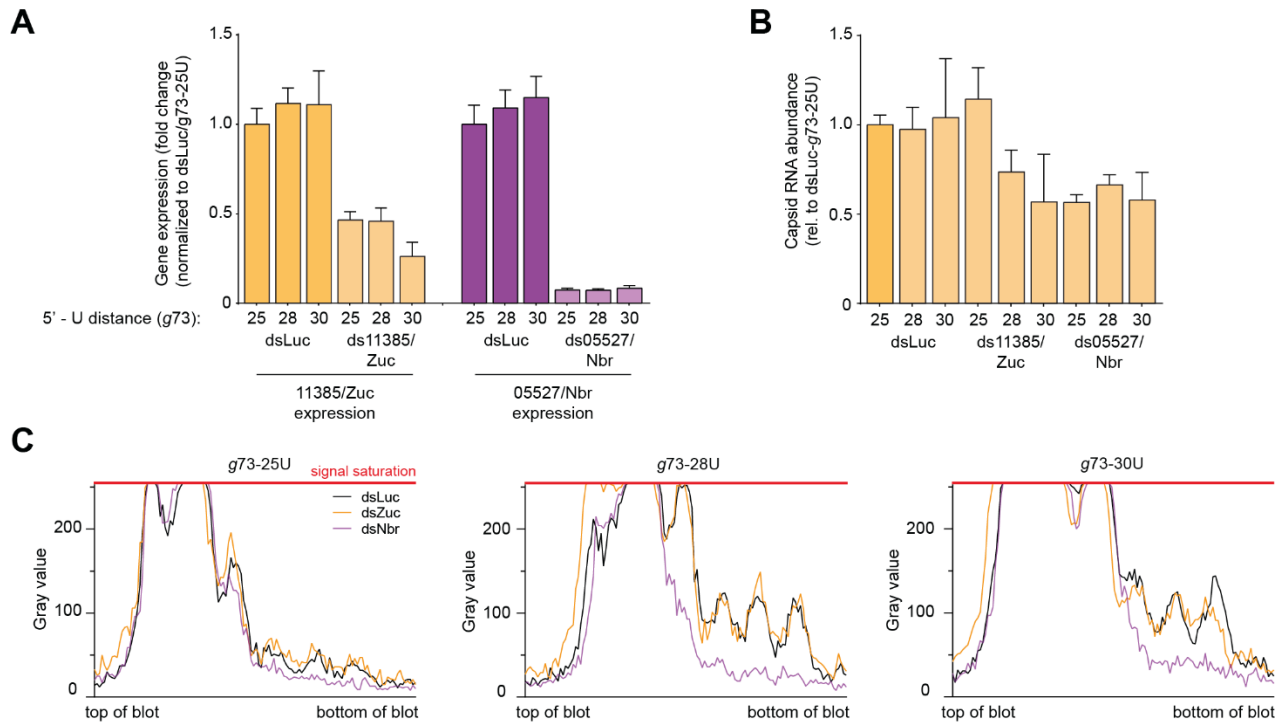

**Figure S6. Nbr- and Zuc knockdown affect piRNA biogenesis**

**(A-B)** RT-qPCR analyses of the knockdown efficiencies of the indicated genes (A) and viral capsid RNA levels (B). Expression values represent the fold change relative to dsLuc treated cells infected with the *g73-25U* virus. Bars and whiskers represent the mean  $\pm$  standard deviation.

**(C)** Quantification of the northern blot signal in Figure 5B, showing the effect of Nbr knockdown on responder piRNA size during infection with the indicated viruses. The Y-axis represents responder piRNA signal intensity, the X-axis represents the position on the northern blot from top to bottom.

640 **Figure S7**

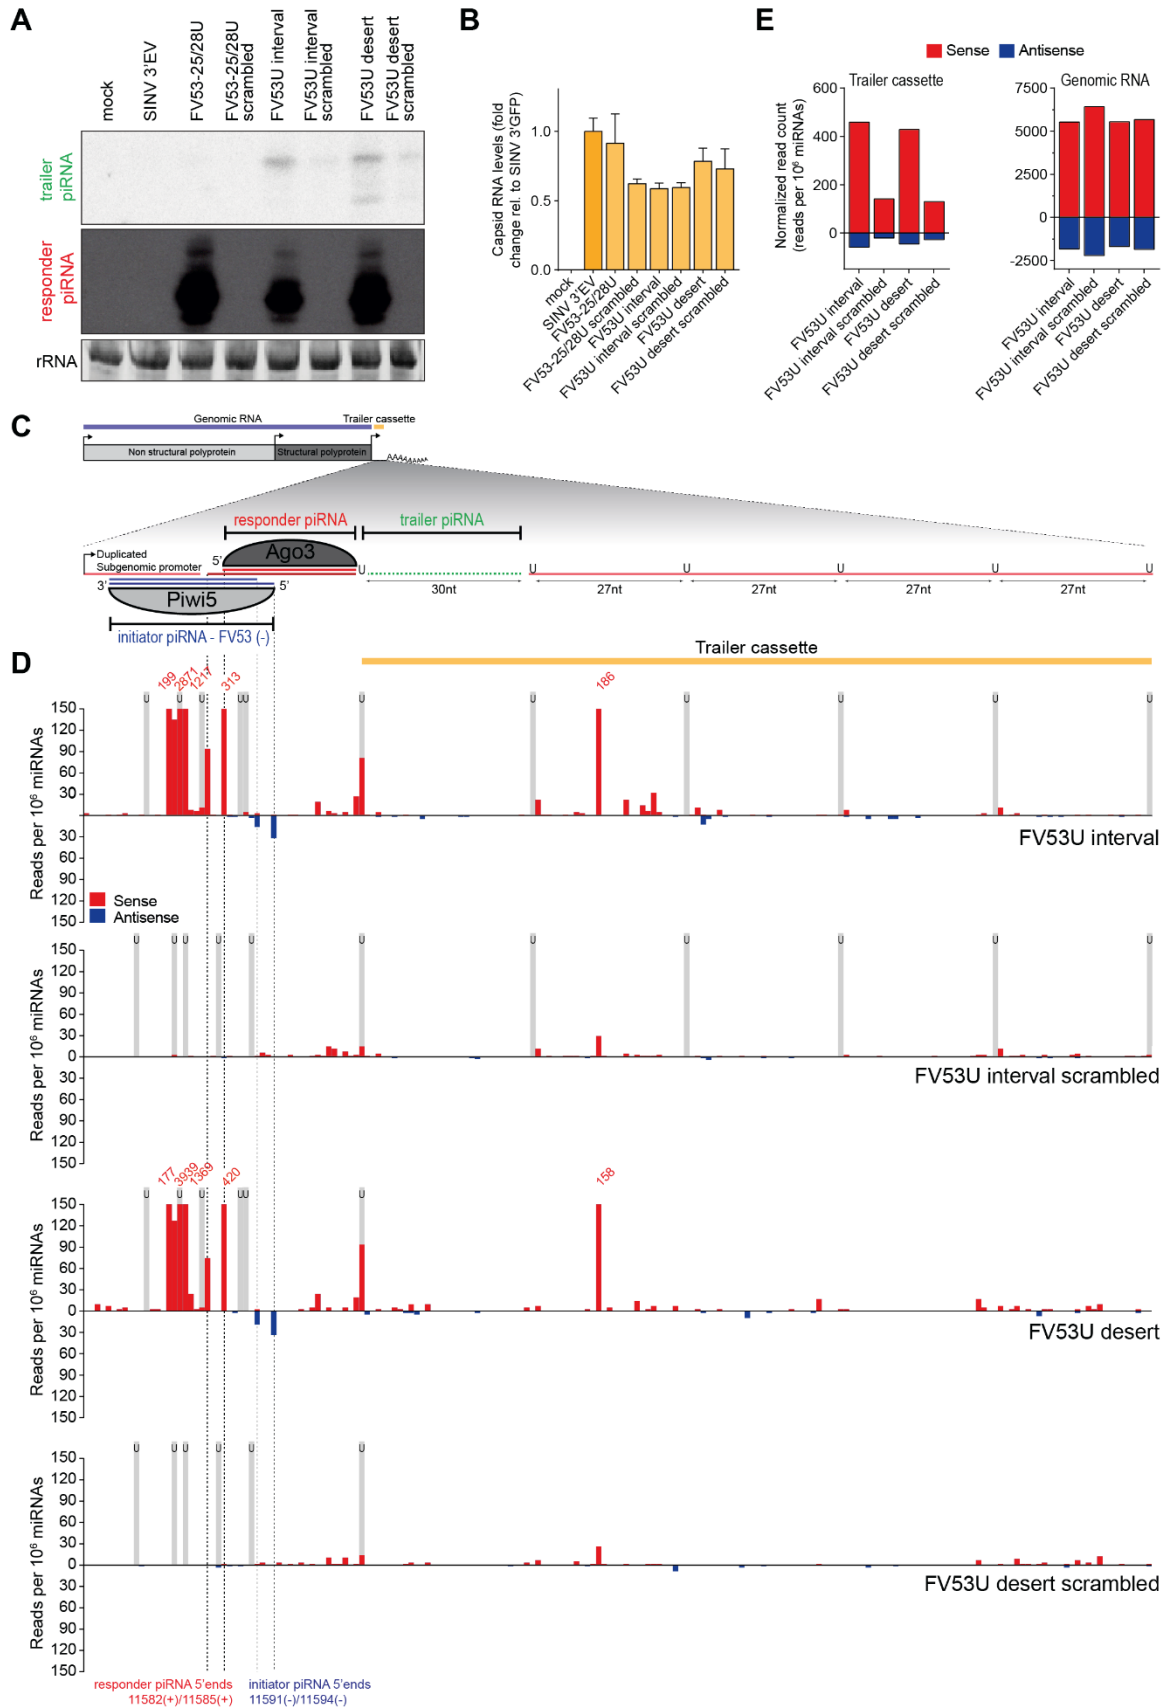

**Figure S7. An EVE-derived piRNA triggers trailer piRNA production downstream of its target site (previous page)**

**(A)** Northern blot analyses showing the production of the first putative trailer piRNA (marked in green in (C)) from the indicated viruses. As a control, the target site was scrambled to abolish targeting by the FV53-derived initiator piRNA. The remainder of the responder piRNA site, as well as the trailer cassette was identical to the U interval and U desert viruses. Additional controls include a virus that lacks the trailer cassette, but contains an FV53 piRNA-target site (FV25-28) and a control virus without any insert (SINV 3' EV). A schematic overview of the FV53 interval virus is shown in (C). rRNA stained by EtBr serves as loading control.

**(B)** Capsid RNA levels in Aag2 cells infected with indicated viruses as determined by RT-qPCR. All capsid RNA levels are shown as a fold change relative to the virus lacking an initiator piRNA target site (SINV 3' EV). Bars and whiskers denote the mean and SD, respectively.

**(C)** Schematic overview of the FV53 U interval virus. In this virus, a duplicated subgenomic promoter drives the expression of a non-coding reporter RNA (shown in the magnification), which contains a target site for two isoforms of a Piwi5-bound FV53-derived initiator piRNA (shown in blue). Slicing of the reporter RNA in the ping-pong amplification loop thus may give rise to two differently sized Ago3-associated responder piRNAs (shown in red). Downstream of this responder piRNA, the trailer cassette is located which either contains uridine residues at regularly spaced intervals (FV53 U interval) or is completely devoid of uridines (FV53 U desert). The first trailer piRNA which was detected in (A) is shown in green.

**(D)** Visualization of normalized counts of 5' ends of sense (red) and antisense (blue) piRNA-sized reads (24-33 nt) mapping to the non-coding reporter RNA. The 5' ends of the two FV53-derived initiator piRNA isoforms, as well as the 5' ends of putative responder piRNAs are indicated by dashed lines. Numbers indicate normalized read counts where they exceed the range of the y-axis and grey shading indicates the position of uridine residues.

**(E)** Quantification of the number of sense (red) and antisense (blue) piRNAs (in reads per  $10^6$  miRNAs) mapping to the trailer cassette (left) and genomic RNA (right) of the indicated recombinant Sindbis viruses. The areas of the viruses denoted as trailer cassette and genomic RNA are indicated in (C) in yellow and blue, respectively.

642 **Figure S8**

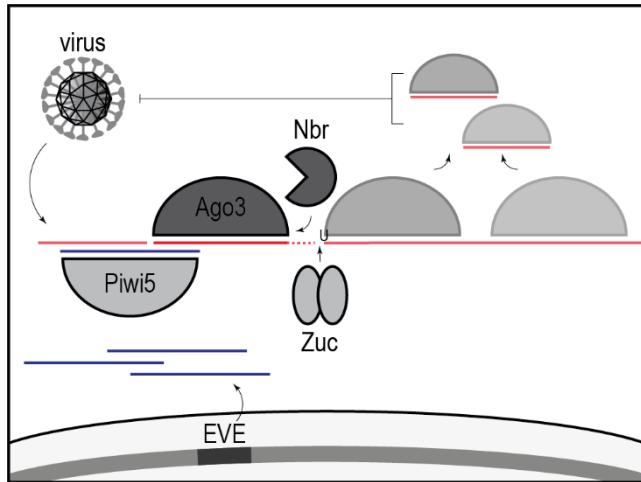

**Figure S8. A model of piRNA-based adaptive immunity in mosquitoes**

Genomically encoded endogenous viral elements (EVE) give rise to a pool of Piwi5-associated initiator piRNAs that have the potential to target newly infecting viruses. Upon acute infection with a virus containing a cognate sequence, EVE-derived piRNAs trigger the production of Ago3-bound responder piRNAs from the viral RNA, which are generated and matured by the combined activities of Zuc and Nbr. Additionally, targeting of the viral RNA by the ping-pong machinery prompts the processing of the downstream RNA into additional trailer piRNAs, thus expanding the piRNA sequence pool that is able to target viral RNA.

643



## 644 REFERENCES

- 645 1. Kraemer, M.U.G., Reiner, R.C., Jr., Brady, O.J., Messina, J.P., Gilbert, M., Pigott, D.M., Yi, D., Johnson,  
646 K., Earl, L., Marczak, L.B. *et al.* (2019) Past and future spread of the arbovirus vectors *Aedes aegypti*  
647 and *Aedes albopictus*. *Nat Microbiol*, **4**, 854-863.
- 648 2. Franz, A.W., Kantor, A.M., Passarelli, A.L. and Clem, R.J. (2015) Tissue Barriers to Arbovirus Infection  
649 in Mosquitoes. *Viruses*, **7**, 3741-3767.
- 650 3. Bronkhorst, A.W. and van Rij, R.P. (2014) The long and short of antiviral defense: small RNA-based  
651 immunity in insects. *Curr Opin Virol*, **7**, 19-28.
- 652 4. Miesen, P., Joosten, J. and van Rij, R.P. (2016) PIWIs Go Viral: Arbovirus-Derived piRNAs in Vector  
653 Mosquitoes. *PLoS Pathog*, **12**, e1006017.
- 654 5. Ozata, D.M., Gainetdinov, I., Zoch, A., O'Carroll, D. and Zamore, P.D. (2019) PIWI-interacting RNAs:  
655 small RNAs with big functions. *Nat Rev Genet*, **20**, 89-108.
- 656 6. Czech, B. and Hannon, G.J. (2016) One Loop to Rule Them All: The Ping-Pong Cycle and piRNA-  
657 Guided Silencing. *Trends Biochem Sci*, **41**, 324-337.
- 658 7. Gainetdinov, I., Colpan, C., Arif, A., Cecchini, K. and Zamore, P.D. (2018) A Single Mechanism of  
659 Biogenesis, Initiated and Directed by PIWI Proteins, Explains piRNA Production in Most Animals. *Mol*  
660 *Cell*, **71**, 775-790 e775.
- 661 8. Han, B.W., Wang, W., Li, C.J., Weng, Z.P. and Zamore, P.D. (2015) piRNA-guided transposon cleavage  
662 initiates Zucchini-dependent, phased piRNA production. *Science*, **348**, 817-821.
- 663 9. Mohn, F., Handler, D. and Brennecke, J. (2015) piRNA-guided slicing specifies transcripts for Zucchini-  
664 dependent, phased piRNA biogenesis. *Science*, **348**, 812-817.
- 665 10. Horwich, M.D., Li, C., Matranga, C., Vagin, V., Farley, G., Wang, P. and Zamore, P.D. (2007) The  
666 *Drosophila* RNA methyltransferase, DmHen1, modifies germline piRNAs and single-stranded siRNAs  
667 in RISC. *Current biology : CB*, **17**, 1265-1272.
- 668 11. Saito, K., Sakaguchi, Y., Suzuki, T., Suzuki, T., Siomi, H. and Siomi, M.C. (2007) Pimet, the *Drosophila*  
669 homolog of HEN1, mediates 2'-O-methylation of Piwi- interacting RNAs at their 3' ends. *Genes &*  
670 *development*, **21**, 1603-1608.
- 671 12. Hayashi, R., Schnabl, J., Handler, D., Mohn, F., Ameres, S.L. and Brennecke, J. (2016) Genetic and  
672 mechanistic diversity of piRNA 3'-end formation. *Nature*, **539**, 588-592.
- 673 13. Feltzin, V.L., Khaladkar, M., Abe, M., Parisi, M., Hendriks, G.J., Kim, J. and Bonini, N.M. (2015) The  
674 exonuclease Nibbler regulates age-associated traits and modulates piRNA length in *Drosophila*.  
675 *Aging Cell*, **14**, 443-452.
- 676 14. Wang, H., Ma, Z., Niu, K., Xiao, Y., Wu, X., Pan, C., Zhao, Y., Wang, K., Zhang, Y. and Liu, N. (2016)  
677 Antagonistic roles of Nibbler and Hen1 in modulating piRNA 3' ends in *Drosophila*. *Development*,  
678 **143**, 530-539.
- 679 15. Sienski, G., Donertas, D. and Brennecke, J. (2012) Transcriptional silencing of transposons by Piwi  
680 and maelstrom and its impact on chromatin state and gene expression. *Cell*, **151**, 964-980.
- 681 16. Le Thomas, A., Rogers, A.K., Webster, A., Marinov, G.K., Liao, S.E., Perkins, E.M., Hur, J.K., Aravin,  
682 A.A. and Toth, K.F. (2013) Piwi induces piRNA-guided transcriptional silencing and establishment of a  
683 repressive chromatin state. *Genes & development*, **27**, 390-399.
- 684 17. Gunawardane, L.S., Saito, K., Nishida, K.M., Miyoshi, K., Kawamura, Y., Nagami, T., Siomi, H. and  
685 Siomi, M.C. (2007) A slicer-mediated mechanism for repeat-associated siRNA 5' end formation in  
686 *Drosophila*. *Science*, **315**, 1587-1590.
- 687 18. Brennecke, J., Aravin, A.A., Stark, A., Dus, M., Kellis, M., Sachidanandam, R. and Hannon, G.J. (2007)  
688 Discrete small RNA-generating loci as master regulators of transposon activity in *Drosophila*. *Cell*,  
689 **128**, 1089-1103.

- 690 19. Malone, C.D., Brennecke, J., Dus, M., Stark, A., McCombie, W.R., Sachidanandam, R. and Hannon,  
691 G.J. (2009) Specialized piRNA pathways act in germline and somatic tissues of the *Drosophila* ovary.  
692 *Cell*, **137**, 522-535.
- 693 20. Li, C., Vagin, V.V., Lee, S., Xu, J., Ma, S., Xi, H., Seitz, H., Horwich, M.D., Syrzycka, M., Honda, B.M. *et*  
694 *al.* (2009) Collapse of germline piRNAs in the absence of Argonaute3 reveals somatic piRNAs in flies.  
695 *Cell*, **137**, 509-521.
- 696 21. Lewis, S.H., Quarles, K.A., Yang, Y., Tanguy, M., Frezal, L., Smith, S.A., Sharma, P.P., Cordaux, R.,  
697 Gilbert, C., Giraud, I. *et al.* (2018) Pan-arthropod analysis reveals somatic piRNAs as an ancestral  
698 defence against transposable elements. *Nat Ecol Evol*, **2**, 174-181.
- 699 22. Akbari, O.S., Antoshechkin, I., Amrhein, H., Williams, B., Diloreto, R., Sandler, J. and Hay, B.A. (2013)  
700 The developmental transcriptome of the mosquito *Aedes aegypti*, an invasive species and major  
701 arbovirus vector. *G3 (Bethesda)*, **3**, 1493-1509.
- 702 23. Morazzani, E.M., Wiley, M.R., Murreddu, M.G., Adelman, Z.N. and Myles, K.M. (2012) Production of  
703 virus-derived ping-pong-dependent piRNA-like small RNAs in the mosquito soma. *PLoS Pathog*, **8**,  
704 e1002470.
- 705 24. Miesen, P., Girardi, E. and van Rij, R.P. (2015) Distinct sets of PIWI proteins produce arbovirus and  
706 transposon-derived piRNAs in *Aedes aegypti* mosquito cells. *Nucleic Acids Res*, **43**, 6545-6556.
- 707 25. Vodovar, N., Bronkhorst, A.W., van Cleef, K.W., Miesen, P., Blanc, H., van Rij, R.P. and Saleh, M.C.  
708 (2012) Arbovirus-derived piRNAs exhibit a ping-pong signature in mosquito cells. *PLoS One*, **7**,  
709 e30861.
- 710 26. Palatini, U., Miesen, P., Carballar-Lejarazu, R., Ometto, L., Rizzo, E., Tu, Z., van Rij, R.P. and Bonizzoni,  
711 M. (2017) Comparative genomics shows that viral integrations are abundant and express piRNAs in  
712 the arboviral vectors *Aedes aegypti* and *Aedes albopictus*. *BMC Genomics*, **18**, 512.
- 713 27. Whitfield, Z.J., Dolan, P.T., Kunitomi, M., Tassetto, M., Seetin, M.G., Oh, S., Heiner, C., Paxinos, E. and  
714 Andino, R. (2017) The Diversity, Structure, and Function of Heritable Adaptive Immunity Sequences  
715 in the *Aedes aegypti* Genome. *Current biology : CB*, **27**, 3511-3519 e3517.
- 716 28. Suzuki, Y., Frangeul, L., Dickson, L.B., Blanc, H., Verdier, Y., Vinh, J., Lambrechts, L. and Saleh, M.C.  
717 (2017) Uncovering the Repertoire of Endogenous Flaviviral Elements in *Aedes* Mosquito Genomes. *J*  
718 *Virology*, **91**.
- 719 29. Ter Horst, A.M., Nigg, J.C., Dekker, F.M. and Falk, B.W. (2019) Endogenous Viral Elements Are  
720 Widespread in Arthropod Genomes and Commonly Give Rise to PIWI-Interacting RNAs. *J Virology*, **93**.
- 721 30. Aguiar, E., de Almeida, J.P.P., Queiroz, L.R., Oliveira, L.S., Olmo, R.P., de Faria, I., Imler, J.L., Gruber,  
722 A., Matthews, B.J. and Marques, J.T. (2020) A single unidirectional piRNA cluster similar to the  
723 flamenco locus is the major source of EVE-derived transcription and small RNAs in *Aedes aegypti*  
724 mosquitoes. *RNA*, **26**, 581-594.
- 725 31. Suzuki, Y.B., A., Miesen, P.; Frangeul, L.; Crist, A.B.; Merklings, S.H.; Fontaine, A.; Lequime, S.; Moltini-  
726 Conclois, I.; Blanc, H.; van Rij, R.P.; Lambrechts, L.; Saleh, M.C. (2020) Non-retroviral endogenous  
727 viral element limits cognate virus replication in *Aedes aegypti* ovaries. *BiorXiv*.
- 728 32. Tassetto, M., Kunitomi, M., Whitfield, Z.J., Dolan, P.T., Sanchez-Vargas, I., Garcia-Knight, M., Ribiero,  
729 I., Chen, T., Olson, K.E. and Andino, R. (2019) Control of RNA viruses in mosquito cells through the  
730 acquisition of vDNA and endogenous viral elements. *Elife*, **8**.
- 731 33. Cristina Crava, F.S.V., Elisa Pischedda, Rebecca Halbach, Umberto Palatini, Michele Marconcini,  
732 Annamaria Mattia, Seth Redmond, Yaw Afrane, Diego Ayala, Christophe Paupy, Rebeca Carballar-  
733 Lejarazu, Pascal Miesen, Ronald P. van Rij, Mariangela Bonizzoni. (2020) Immunity to infections in  
734 arboviral vectors by integrated viral sequences: an evolutionary perspective. *BiorXiv*.
- 735 34. Joosten, J., Miesen, P., Taskopru, E., Pennings, B., Jansen, P., Huynen, M.A., Vermeulen, M. and Van  
736 Rij, R.P. (2019) The Tudor protein Veneno assembles the ping-pong amplification complex that  
737 produces viral piRNAs in *Aedes* mosquitoes. *Nucleic Acids Res*, **47**, 2546-2559.

- 738 35. Ipsaro, J.J., Haase, A.D., Knott, S.R., Joshua-Tor, L. and Hannon, G.J. (2012) The structural  
739 biochemistry of Zucchini implicates it as a nuclease in piRNA biogenesis. *Nature*, **491**, 279-283.
- 740 36. Nishimasu, H., Ishizu, H., Saito, K., Fukuhara, S., Kamatani, M.K., Bonnefond, L., Matsumoto, N.,  
741 Nishizawa, T., Nakanaga, K., Aoki, J. *et al.* (2012) Structure and function of Zucchini endoribonuclease  
742 in piRNA biogenesis. *Nature*, **491**, 284-287.
- 743 37. Izumi, N., Shoji, K., Suzuki, Y., Katsuma, S. and Tomari, Y. (2020) Zucchini consensus motifs determine  
744 the mechanism of pre-piRNA production. *Nature*, **578**, 311-316.
- 745 38. Fredericks, A.C., Russell, T.A., Wallace, L.E., Davidson, A.D., Fernandez-Sesma, A. and Maringer, K.  
746 (2019) *Aedes aegypti* (Aag2)-derived clonal mosquito cell lines reveal the effects of pre-existing  
747 persistent infection with the insect-specific bunyavirus Phasi Charoen-like virus on arbovirus  
748 replication. *PLoS Negl Trop Dis*, **13**, e0007346.
- 749 39. Reuter, M., Berninger, P., Chuma, S., Shah, H., Hosokawa, M., Funaya, C., Antony, C.,  
750 Sachidanandam, R. and Pillai, R.S. (2011) Miwi catalysis is required for piRNA amplification-  
751 independent LINE1 transposon silencing. *Nature*, **480**, 264-267.
- 752 40. Pane, A., Wehr, K. and Schupbach, T. (2007) zucchini and squash encode two putative nucleases  
753 required for rasiRNA production in the *Drosophila* germline. *Developmental cell*, **12**, 851-862.
- 754 41. Huang, H., Li, Y., Szulwach, K.E., Zhang, G., Jin, P. and Chen, D. (2014) AGO3 Slicer activity regulates  
755 mitochondria-nuage localization of Armitage and piRNA amplification. *J Cell Biol*, **206**, 217-230.
- 756 42. Haase, A.D., Fenoglio, S., Muerdter, F., Guzzardo, P.M., Czech, B., Pappin, D.J., Chen, C., Gordon, A.  
757 and Hannon, G.J. (2010) Probing the initiation and effector phases of the somatic piRNA pathway in  
758 *Drosophila*. *Genes & development*, **24**, 2499-2504.
- 759 43. Han, B.W., Hung, J.H., Weng, Z., Zamore, P.D. and Ameres, S.L. (2011) The 3'-to-5' exoribonuclease  
760 Nibbler shapes the 3' ends of microRNAs bound to *Drosophila* Argonaute1. *Curr Biol*, **21**, 1878-1887.
- 761 44. Liu, N., Abe, M., Sabin, L.R., Hendriks, G.J., Naqvi, A.S., Yu, Z., Cherry, S. and Bonini, N.M. (2011) The  
762 exoribonuclease Nibbler controls 3' end processing of microRNAs in *Drosophila*. *Curr Biol*, **21**, 1888-  
763 1893.
- 764 45. Etebari, K., Osei-Amo, S., Blomberg, S.P. and Asgari, S. (2015) Dengue virus infection alters post-  
765 transcriptional modification of microRNAs in the mosquito vector *Aedes aegypti*. *Sci Rep*, **5**, 15968.
- 766 46. Li, S., Mead, E.A., Liang, S. and Tu, Z. (2009) Direct sequencing and expression analysis of a large  
767 number of miRNAs in *Aedes aegypti* and a multi-species survey of novel mosquito miRNAs. *BMC*  
768 *Genomics*, **10**, 581.
- 769 47. Reichholf, B., Herzog, V.A., Fasching, N., Manzenreither, R.A., Sowemimo, I. and Ameres, S.L. (2019)  
770 Time-Resolved Small RNA Sequencing Unravels the Molecular Principles of MicroRNA Homeostasis.  
771 *Mol Cell*, **75**, 756-768 e757.
- 772 48. Izumi, N., Shoji, K., Sakaguchi, Y., Honda, S., Kirino, Y., Suzuki, T., Katsuma, S. and Tomari, Y. (2016)  
773 Identification and Functional Analysis of the Pre-piRNA 3' Trimmer in Silkworms. *Cell*, **164**, 962-973.
- 774 49. Tang, W., Tu, S., Lee, H.C., Weng, Z. and Mello, C.C. (2016) The RNase PARN-1 Trims piRNA 3' Ends to  
775 Promote Transcriptome Surveillance in *C. elegans*. *Cell*, **164**, 974-984.
- 776 50. Hahn, C.S., Hahn, Y.S., Braciale, T.J. and Rice, C.M. (1992) Infectious Sindbis virus transient  
777 expression vectors for studying antigen processing and presentation. *Proc Natl Acad Sci U S A*, **89**,  
778 2679-2683.
- 779 51. Saleh, M.C., Tassetto, M., van Rij, R.P., Goic, B., Gausson, V., Berry, B., Jacquier, C., Antoniewski, C.  
780 and Andino, R. (2009) Antiviral immunity in *Drosophila* requires systemic RNA interference spread.  
781 *Nature*, **458**, 346-350.
- 782 52. Livingstone, C.D. and Barton, G.J. (1993) Protein sequence alignments: a strategy for the hierarchical  
783 analysis of residue conservation. *Comput Appl Biosci*, **9**, 745-756.
- 784 53. Pall, G.S. and Hamilton, A.J. (2008) Improved northern blot method for enhanced detection of small  
785 RNA. *Nat Protoc*, **3**, 1077-1084.

- 786 54. Blankenberg, D., Gordon, A., Von Kuster, G., Coraor, N., Taylor, J., Nekrutenko, A. and Galaxy, T.  
787 (2010) Manipulation of FASTQ data with Galaxy. *Bioinformatics*, **26**, 1783-1785.
- 788 55. Maringer, K., Yousuf, A., Heesom, K.J., Fan, J., Lee, D., Fernandez-Sesma, A., Bessant, C., Matthews,  
789 D.A. and Davidson, A.D. (2017) Proteomics informed by transcriptomics for characterising active  
790 transposable elements and genome annotation in *Aedes aegypti*. *Bmc Genomics*, **18**, 101.
- 791 56. Crooks, G.E., Hon, G., Chandonia, J.M. and Brenner, S.E. (2004) WebLogo: a sequence logo  
792 generator. *Genome Res*, **14**, 1188-1190.
- 793 57. Livak, K.J. and Schmittgen, T.D. (2001) Analysis of relative gene expression data using real-time  
794 quantitative PCR and the 2(-Delta Delta C(T)) Method. *Methods*, **25**, 402-408.
- 795 58. Halbach, R., Miesen, P., Joosten, J., Taskopru, E., Rondeel, I., Pennings, B., Vogels, C.B.F., Merklung,  
796 S.H., Koenraadt, C.J., Lambrechts, L. *et al.* (2020) A satellite repeat-derived piRNA controls embryonic  
797 development of *Aedes*. *Nature*, **580**, 274-277.

798
